# Supplementary material for: Alcohol-Tolerant Workplace Environments Are a Risk Factor for Young Adult Alcohol Misuse on and off the Job in Australia and the United States
Source: MDPI journal article supplement (doi:10.3390/ijerph20186725), 2023-09-07
Supplement: s1 [file s1]

## SUPPLEMENTAL TABLES S10 TO S16: DETAILED REGRESSION RESULTS FOR GENERAL HIGH-RISK DRINKING

Tables S10a-c. Estimates from logistic regression of general high-risk drinking in the past year on alcohol availability at work and covariates

| Table S10a. Model 1                             | Victoria     |              |              |          |              |              |              |              | Washington   |              |               |          |              |              |              |              |
|-------------------------------------------------|--------------|--------------|--------------|----------|--------------|--------------|--------------|--------------|--------------|--------------|---------------|----------|--------------|--------------|--------------|--------------|
|                                                 | B            | S.E.         | Wald         | df       | Sig.         | Exp(B)       | 95% C.I. for |              | B            | S.E.         | Wald          | df       | Sig.         | Exp(B)       | 95% C.I. for |              |
|                                                 |              |              |              |          |              |              | Lower        | Upper        |              |              |               |          |              |              | Lower        | Upper        |
| <b>Alcohol available in the workplace (0/1)</b> | <b>0.356</b> | <b>0.169</b> | <b>4.470</b> | <b>1</b> | <b>0.035</b> | <b>1.428</b> | <b>1.026</b> | <b>1.987</b> | <b>0.904</b> | <b>0.230</b> | <b>15.525</b> | <b>1</b> | <b>0.000</b> | <b>2.470</b> | <b>1.575</b> | <b>3.874</b> |
| Adolescent alcohol use (1-8)                    | 0.163        | 0.051        | 10.109       | 1        | 0.001        | 1.177        | 1.065        | 1.302        | 0.241        | 0.087        | 7.740         | 1        | 0.005        | 1.273        | 1.074        | 1.509        |
| Male (0/1)                                      | 0.945        | 0.174        | 29.348       | 1        | 0.000        | 2.572        | 1.827        | 3.619        | 0.563        | 0.208        | 7.320         | 1        | 0.007        | 1.757        | 1.168        | 2.642        |
| White (0/1)                                     | -0.278       | 0.294        | 0.897        | 1        | 0.344        | 0.757        | 0.426        | 1.346        | -0.058       | 0.250        | 0.054         | 1        | 0.817        | 0.944        | 0.578        | 1.541        |
| 4-year college graduate (0/1)                   | 0.162        | 0.184        | 0.767        | 1        | 0.381        | 1.175        | 0.819        | 1.687        | -0.239       | 0.244        | 0.955         | 1        | 0.328        | 0.788        | 0.488        | 1.271        |
| Currently full-time student (0/1)               | -0.199       | 0.289        | 0.475        | 1        | 0.491        | 0.819        | 0.465        | 1.444        | -0.109       | 0.334        | 0.107         | 1        | 0.744        | 0.897        | 0.466        | 1.725        |
| Married (0/1)                                   | -2.146       | 0.739        | 8.434        | 1        | 0.004        | 0.117        | 0.027        | 0.498        | -0.620       | 0.311        | 3.962         | 1        | 0.047        | 0.538        | 0.292        | 0.991        |
| Has child or children (0/1)                     | -0.757       | 0.344        | 4.845        | 1        | 0.028        | 0.469        | 0.239        | 0.920        | -0.818       | 0.305        | 7.198         | 1        | 0.007        | 0.441        | 0.243        | 0.802        |
| Financial problems (0/1)                        | 0.283        | 0.206        | 1.893        | 1        | 0.169        | 1.327        | 0.887        | 1.986        | 0.187        | 0.222        | 0.713         | 1        | 0.399        | 1.206        | 0.781        | 1.863        |
| Months of full-time employment (1-12)           | 0.009        | 0.019        | 0.202        | 1        | 0.653        | 1.009        | 0.971        | 1.048        | -0.029       | 0.023        | 1.536         | 1        | 0.215        | 0.972        | 0.929        | 1.017        |
| High-risk industry (0/1)                        | 0.049        | 0.178        | 0.077        | 1        | 0.782        | 1.051        | 0.741        | 1.490        | 0.265        | 0.213        | 1.547         | 1        | 0.214        | 1.303        | 0.859        | 1.977        |
| Constant                                        | -1.776       | 0.397        | 20.039       | 1        | 0.000        | 0.169        |              |              | -2.102       | 0.414        | 25.826        | 1        | 0.000        | 0.122        |              |              |

  

| Table S10b. Model 2                            | Victoria     |              |               |          |              |              |              |              | Washington   |              |               |          |              |              |              |              |
|------------------------------------------------|--------------|--------------|---------------|----------|--------------|--------------|--------------|--------------|--------------|--------------|---------------|----------|--------------|--------------|--------------|--------------|
|                                                | B            | S.E.         | Wald          | df       | Sig.         | Exp(B)       | 95% C.I. for |              | B            | S.E.         | Wald          | df       | Sig.         | Exp(B)       | 95% C.I. for |              |
|                                                |              |              |               |          |              |              | Lower        | Upper        |              |              |               |          |              |              | Lower        | Upper        |
| <b>Alcohol available in the workplace</b>      | <b>0.046</b> | <b>0.189</b> | <b>0.061</b>  | <b>1</b> | <b>0.806</b> | <b>1.048</b> | <b>0.724</b> | <b>1.517</b> | <b>0.370</b> | <b>0.265</b> | <b>1.954</b>  | <b>1</b> | <b>0.162</b> | <b>1.448</b> | <b>0.862</b> | <b>2.433</b> |
| <b>Alcohol use or impairment at work (0/1)</b> | <b>0.817</b> | <b>0.203</b> | <b>16.167</b> | <b>1</b> | <b>0.000</b> | <b>2.263</b> | <b>1.520</b> | <b>3.370</b> | <b>1.321</b> | <b>0.275</b> | <b>23.069</b> | <b>1</b> | <b>0.000</b> | <b>3.748</b> | <b>2.186</b> | <b>6.427</b> |
| Adolescent alcohol use (1-8)                   | 0.149        | 0.052        | 8.206         | 1        | 0.004        | 1.161        | 1.048        | 1.286        | 0.252        | 0.089        | 7.938         | 1        | 0.005        | 1.286        | 1.080        | 1.532        |
| Male (0/1)                                     | 0.908        | 0.177        | 26.459        | 1        | 0.000        | 2.479        | 1.754        | 3.504        | 0.520        | 0.213        | 5.977         | 1        | 0.014        | 1.681        | 1.109        | 2.550        |
| White (0/1)                                    | -0.254       | 0.297        | 0.731         | 1        | 0.392        | 0.776        | 0.433        | 1.389        | -0.003       | 0.255        | 0.000         | 1        | 0.990        | 0.997        | 0.604        | 1.645        |
| 4-year college graduate (0/1)                  | 0.100        | 0.187        | 0.287         | 1        | 0.592        | 1.105        | 0.766        | 1.595        | -0.332       | 0.254        | 1.710         | 1        | 0.191        | 0.718        | 0.436        | 1.180        |
| Currently full-time student (0/1)              | -0.153       | 0.292        | 0.277         | 1        | 0.599        | 0.858        | 0.484        | 1.520        | -0.119       | 0.342        | 0.121         | 1        | 0.728        | 0.888        | 0.455        | 1.734        |
| Married (0/1)                                  | -2.055       | 0.741        | 7.681         | 1        | 0.006        | 0.128        | 0.030        | 0.548        | -0.518       | 0.316        | 2.682         | 1        | 0.101        | 0.596        | 0.321        | 1.107        |
| Has child or children (0/1)                    | -0.734       | 0.346        | 4.487         | 1        | 0.034        | 0.480        | 0.244        | 0.947        | -0.841       | 0.311        | 7.315         | 1        | 0.007        | 0.431        | 0.235        | 0.793        |
| Financial problems (0/1)                       | 0.296        | 0.207        | 2.034         | 1        | 0.154        | 1.344        | 0.895        | 2.019        | 0.237        | 0.228        | 1.079         | 1        | 0.299        | 1.267        | 0.811        | 1.981        |
| Months of full-time employment (1-12)          | 0.002        | 0.020        | 0.013         | 1        | 0.910        | 1.002        | 0.964        | 1.042        | -0.031       | 0.024        | 1.727         | 1        | 0.189        | 0.969        | 0.925        | 1.015        |
| High-risk industry (0/1)                       | 0.056        | 0.180        | 0.098         | 1        | 0.755        | 1.058        | 0.743        | 1.506        | 0.249        | 0.217        | 1.318         | 1        | 0.251        | 1.283        | 0.838        | 1.965        |
| Constant                                       | -1.763       | 0.400        | 19.419        | 1        | 0.000        | 0.171        |              |              | -2.243       | 0.428        | 27.447        | 1        | 0.000        | 0.106        |              |              |

**Table S10c. Model 3**

|                                           | Pooled Sample |              |              |          |              |              | 95% C.I. for |              |
|-------------------------------------------|---------------|--------------|--------------|----------|--------------|--------------|--------------|--------------|
|                                           | B             | S.E.         | Wald         | df       | Sig.         | Exp(B)       | Lower        | Upper        |
| State (1=VIC, 0=WA)                       | 0.279         | 0.150        | 3.454        | 1        | 0.063        | 1.322        | 0.985        | 1.773        |
| <b>Alcohol available in the workplace</b> | <b>0.186</b>  | <b>0.153</b> | <b>1.463</b> | <b>1</b> | <b>0.226</b> | <b>1.204</b> | <b>0.891</b> | <b>1.626</b> |
| Alcohol use or impairment at work (0/1)   | 1.009         | 0.163        | 38.351       | 1        | 0.000        | 2.744        | 1.994        | 3.777        |
| Adolescent alcohol use (1-8)              | 0.172         | 0.045        | 14.987       | 1        | 0.000        | 1.188        | 1.089        | 1.297        |
| Male (0/1)                                | 0.714         | 0.134        | 28.480       | 1        | 0.000        | 2.043        | 1.571        | 2.656        |
| White (0/1)                               | -0.124        | 0.189        | 0.430        | 1        | 0.512        | 0.883        | 0.610        | 1.279        |
| 4-year college graduate (0/1)             | -0.056        | 0.147        | 0.146        | 1        | 0.702        | 0.945        | 0.708        | 1.262        |
| Currently full-time student (0/1)         | -0.127        | 0.220        | 0.333        | 1        | 0.564        | 0.881        | 0.573        | 1.355        |
| Married (0/1)                             | -0.870        | 0.278        | 9.772        | 1        | 0.002        | 0.419        | 0.243        | 0.723        |
| Has child or children (0/1)               | -0.796        | 0.228        | 12.226       | 1        | 0.000        | 0.451        | 0.289        | 0.705        |
| Financial problems (0/1)                  | 0.243         | 0.152        | 2.563        | 1        | 0.109        | 1.275        | 0.947        | 1.716        |
| Months of full-time employment (1-12)     | -0.012        | 0.015        | 0.683        | 1        | 0.408        | 0.988        | 0.959        | 1.017        |
| High-risk industry (0/1)                  | 0.174         | 0.136        | 1.631        | 1        | 0.202        | 1.190        | 0.911        | 1.554        |
| Constant                                  | -2.129        | 0.276        | 59.334       | 1        | 0.000        | 0.119        |              |              |

**State x Alcohol Availability Interaction**

| B | S.E. | Wald | df | Sig. | Exp(B) | 95% C.I. for |       |
|---|------|------|----|------|--------|--------------|-------|
|   |      |      |    |      |        | Lower        | Upper |

**-0.562 0.282 3.978 1 0.046 0.570 0.328 0.990**

Tables S11a-c. Estimates from logistic regression of general high-risk drinking in the past year on workplace alcohol policy and covariates

| Table S11a. Model 1                    | Victoria |       |        |    |       |        |             |       | Washington |       |        |    |       |        |             |       |
|----------------------------------------|----------|-------|--------|----|-------|--------|-------------|-------|------------|-------|--------|----|-------|--------|-------------|-------|
|                                        | B        | S.E.  | Wald   | df | Sig.  | Exp(B) | 95% C.I.for |       | B          | S.E.  | Wald   | df | Sig.  | Exp(B) | 95% C.I.for |       |
|                                        |          |       |        |    |       |        | Lower       | Upper |            |       |        |    |       |        | Lower       | Upper |
| Workplace has a written alcohol policy |          |       |        |    |       |        |             |       |            |       |        |    |       |        |             |       |
| Yes (reference)                        |          |       | 0.288  | 2  | 0.866 |        |             |       |            |       | 9.963  | 2  | 0.007 |        |             |       |
| No                                     | 0.122    | 0.237 | 0.267  | 1  | 0.605 | 1.130  | 0.711       | 1.797 | 0.483      | 0.298 | 2.624  | 1  | 0.105 | 1.621  | 0.904       | 2.908 |
| Don't know                             | 0.054    | 0.196 | 0.076  | 1  | 0.783 | 1.056  | 0.719       | 1.550 | 0.756      | 0.250 | 9.123  | 1  | 0.003 | 2.130  | 1.304       | 3.478 |
| Adolescent alcohol use (1-8)           | 0.169    | 0.051 | 10.751 | 1  | 0.001 | 1.184  | 1.070       | 1.309 | 0.298      | 0.085 | 12.168 | 1  | 0.000 | 1.347  | 1.140       | 1.593 |
| Male (0/1)                             | 0.952    | 0.174 | 29.915 | 1  | 0.000 | 2.590  | 1.842       | 3.643 | 0.566      | 0.208 | 7.411  | 1  | 0.006 | 1.762  | 1.172       | 2.649 |
| White (0/1)                            | -0.227   | 0.293 | 0.599  | 1  | 0.439 | 0.797  | 0.449       | 1.415 | -0.003     | 0.249 | 0.000  | 1  | 0.991 | 0.997  | 0.612       | 1.625 |
| 4-year college graduate (0/1)          | 0.209    | 0.184 | 1.291  | 1  | 0.256 | 1.233  | 0.859       | 1.769 | -0.183     | 0.242 | 0.574  | 1  | 0.449 | 0.833  | 0.518       | 1.337 |
| Currently full-time student (0/1)      | -0.238   | 0.288 | 0.683  | 1  | 0.409 | 0.788  | 0.448       | 1.386 | -0.156     | 0.333 | 0.220  | 1  | 0.639 | 0.856  | 0.446       | 1.642 |
| Married (0/1)                          | -2.102   | 0.738 | 8.117  | 1  | 0.004 | 0.122  | 0.029       | 0.519 | -0.594     | 0.309 | 3.691  | 1  | 0.055 | 0.552  | 0.301       | 1.012 |
| Has child or children (0/1)            | -0.808   | 0.343 | 5.563  | 1  | 0.018 | 0.446  | 0.228       | 0.872 | -0.866     | 0.305 | 8.067  | 1  | 0.005 | 0.421  | 0.232       | 0.765 |
| Financial problems (0/1)               | 0.254    | 0.206 | 1.526  | 1  | 0.217 | 1.289  | 0.861       | 1.930 | 0.028      | 0.219 | 0.016  | 1  | 0.900 | 1.028  | 0.669       | 1.580 |
| Months of full-time employment (1-12)  | 0.010    | 0.020 | 0.256  | 1  | 0.613 | 1.010  | 0.972       | 1.049 | -0.021     | 0.023 | 0.833  | 1  | 0.361 | 0.979  | 0.936       | 1.024 |
| High-risk industry (0/1)               | 0.043    | 0.180 | 0.058  | 1  | 0.810 | 1.044  | 0.734       | 1.486 | 0.397      | 0.210 | 3.586  | 1  | 0.058 | 1.488  | 0.986       | 2.245 |
| Constant                               | -1.717   | 0.409 | 17.647 | 1  | 0.000 | 0.180  |             |       | -2.300     | 0.425 | 29.328 | 1  | 0.000 | 0.100  |             |       |

| Table S11b. Model 2                     | Victoria |       |        |    |       |        |             |       | Washington |       |        |    |       |        |             |       |
|-----------------------------------------|----------|-------|--------|----|-------|--------|-------------|-------|------------|-------|--------|----|-------|--------|-------------|-------|
|                                         | B        | S.E.  | Wald   | df | Sig.  | Exp(B) | 95% C.I.for |       | B          | S.E.  | Wald   | df | Sig.  | Exp(B) | 95% C.I.for |       |
|                                         |          |       |        |    |       |        | Lower       | Upper |            |       |        |    |       |        | Lower       | Upper |
| Workplace has a written alcohol policy  |          |       |        |    |       |        |             |       |            |       |        |    |       |        |             |       |
| Yes (reference)                         |          |       | 0.082  | 2  | 0.960 |        |             |       |            |       | 6.846  | 2  | 0.033 |        |             |       |
| No                                      | -0.070   | 0.245 | 0.081  | 1  | 0.775 | 0.932  | 0.577       | 1.508 | 0.192      | 0.316 | 0.371  | 1  | 0.543 | 1.212  | 0.653       | 2.250 |
| Don't know                              | -0.020   | 0.200 | 0.010  | 1  | 0.922 | 0.981  | 0.663       | 1.451 | 0.682      | 0.261 | 6.846  | 1  | 0.009 | 1.977  | 1.187       | 3.295 |
| Alcohol use or impairment at work (0/1) | 0.842    | 0.187 | 20.164 | 1  | 0.000 | 2.320  | 1.607       | 3.350 | 1.465      | 0.251 | 33.999 | 1  | 0.000 | 4.329  | 2.645       | 7.084 |
| Adolescent alcohol use (1-8)            | 0.147    | 0.053 | 7.778  | 1  | 0.005 | 1.158  | 1.045       | 1.284 | 0.282      | 0.089 | 10.005 | 1  | 0.002 | 1.326  | 1.113       | 1.579 |
| Male (0/1)                              | 0.908    | 0.177 | 26.445 | 1  | 0.000 | 2.480  | 1.754       | 3.505 | 0.541      | 0.213 | 6.417  | 1  | 0.011 | 1.717  | 1.130       | 2.609 |
| White (0/1)                             | -0.249   | 0.296 | 0.706  | 1  | 0.401 | 0.780  | 0.436       | 1.394 | -0.032     | 0.256 | 0.015  | 1  | 0.902 | 0.969  | 0.587       | 1.600 |
| 4-year college graduate (0/1)           | 0.097    | 0.188 | 0.268  | 1  | 0.605 | 1.102  | 0.762       | 1.593 | -0.364     | 0.256 | 2.022  | 1  | 0.155 | 0.695  | 0.421       | 1.148 |
| Currently full-time student (0/1)       | -0.158   | 0.292 | 0.293  | 1  | 0.589 | 0.854  | 0.482       | 1.513 | -0.120     | 0.345 | 0.121  | 1  | 0.728 | 0.887  | 0.452       | 1.743 |
| Married (0/1)                           | -2.055   | 0.741 | 7.683  | 1  | 0.006 | 0.128  | 0.030       | 0.548 | -0.488     | 0.316 | 2.391  | 1  | 0.122 | 0.614  | 0.330       | 1.140 |
| Has child or children (0/1)             | -0.735   | 0.346 | 4.513  | 1  | 0.034 | 0.480  | 0.244       | 0.945 | -0.879     | 0.312 | 7.951  | 1  | 0.005 | 0.415  | 0.226       | 0.765 |
| Financial problems (0/1)                | 0.288    | 0.208 | 1.908  | 1  | 0.167 | 1.333  | 0.887       | 2.005 | 0.166      | 0.228 | 0.529  | 1  | 0.467 | 1.181  | 0.755       | 1.847 |
| Months of full-time employment (1-12)   | 0.002    | 0.020 | 0.006  | 1  | 0.936 | 1.002  | 0.963       | 1.041 | -0.025     | 0.024 | 1.058  | 1  | 0.304 | 0.976  | 0.931       | 1.023 |
| High-risk industry (0/1)                | 0.055    | 0.183 | 0.092  | 1  | 0.762 | 1.057  | 0.739       | 1.512 | 0.307      | 0.217 | 1.997  | 1  | 0.158 | 1.360  | 0.888       | 2.082 |
| Constant                                | -1.721   | 0.411 | 17.499 | 1  | 0.000 | 0.179  |             |       | -2.429     | 0.439 | 30.559 | 1  | 0.000 | 0.088  |             |       |

**Table S11c. Model 3**

|                                               | Pooled Sample |              |              |          |              |              |                             | State x Alcohol Policy Interaction |              |              |          |              |              |                             |
|-----------------------------------------------|---------------|--------------|--------------|----------|--------------|--------------|-----------------------------|------------------------------------|--------------|--------------|----------|--------------|--------------|-----------------------------|
|                                               | B             | S.E.         | Wald         | df       | Sig.         | Exp(B)       | 95% C.I. for<br>Lower Upper | B                                  | S.E.         | Wald         | df       | Sig.         | Exp(B)       | 95% C.I. for<br>Lower Upper |
| State (1=VIC, 0=WA)                           | 0.279         | 0.150        | 3.474        | 1        | 0.062        | 1.322        | 0.986 1.772                 |                                    |              |              |          |              |              |                             |
| <b>Workplace has a written alcohol policy</b> |               |              |              |          |              |              |                             |                                    |              |              |          |              |              |                             |
| <b>Yes</b> (reference)                        |               |              | 2.233        | 2        | 0.327        |              |                             |                                    |              | 5.232        | 2        | 0.073        |              |                             |
| <b>No</b>                                     | <b>0.055</b>  | <b>0.193</b> | <b>0.081</b> | <b>1</b> | <b>0.775</b> | <b>1.057</b> | <b>0.724 1.541</b>          | <b>-0.411</b>                      | <b>0.388</b> | <b>1.124</b> | <b>1</b> | <b>0.289</b> | <b>0.663</b> | <b>0.310 1.418</b>          |
| <b>Don't know</b>                             | <b>0.236</b>  | <b>0.158</b> | <b>2.224</b> | <b>1</b> | <b>0.136</b> | <b>1.266</b> | <b>0.929 1.725</b>          | <b>-0.705</b>                      | <b>0.317</b> | <b>4.957</b> | <b>1</b> | <b>0.026</b> | <b>0.494</b> | <b>0.266 0.919</b>          |
| Alcohol use or impairment at work (0/1)       | 1.078         | 0.149        | 52.040       | 1        | 0.000        | 2.940        | 2.193 3.940                 |                                    |              |              |          |              |              |                             |
| Adolescent alcohol use (1-8)                  | 0.180         | 0.045        | 16.198       | 1        | 0.000        | 1.197        | 1.097 1.307                 |                                    |              |              |          |              |              |                             |
| Male (0/1)                                    | 0.715         | 0.134        | 28.517       | 1        | 0.000        | 2.045        | 1.573 2.658                 |                                    |              |              |          |              |              |                             |
| White (0/1)                                   | -0.123        | 0.189        | 0.426        | 1        | 0.514        | 0.884        | 0.611 1.280                 |                                    |              |              |          |              |              |                             |
| 4-year college graduate (0/1)                 | -0.048        | 0.147        | 0.105        | 1        | 0.746        | 0.953        | 0.714 1.273                 |                                    |              |              |          |              |              |                             |
| Currently full-time student (0/1)             | -0.148        | 0.220        | 0.452        | 1        | 0.501        | 0.863        | 0.561 1.327                 |                                    |              |              |          |              |              |                             |
| Married (0/1)                                 | -0.859        | 0.278        | 9.559        | 1        | 0.002        | 0.423        | 0.246 0.730                 |                                    |              |              |          |              |              |                             |
| Has child or children (0/1)                   | -0.800        | 0.227        | 12.407       | 1        | 0.000        | 0.449        | 0.288 0.701                 |                                    |              |              |          |              |              |                             |
| Financial problems (0/1)                      | 0.217         | 0.152        | 2.049        | 1        | 0.152        | 1.243        | 0.923 1.674                 |                                    |              |              |          |              |              |                             |
| Months of full-time employment (1-12)         | -0.010        | 0.015        | 0.452        | 1        | 0.502        | 0.990        | 0.961 1.020                 |                                    |              |              |          |              |              |                             |
| High-risk industry (0/1)                      | 0.198         | 0.137        | 2.075        | 1        | 0.150        | 1.219        | 0.931 1.595                 |                                    |              |              |          |              |              |                             |
| Constant                                      | -2.183        | 0.282        | 59.706       | 1        | 0.000        | 0.113        |                             |                                    |              |              |          |              |              |                             |

Tables S12a-c. Estimates from logistic regression of general high-risk drinking in the past year on workplace alcohol policy that bans alcohol and covariates

| Table S12a. Model 1                           | Victoria     |              |              |          |              |              |              |              | Washington   |              |               |          |              |              |              |              |
|-----------------------------------------------|--------------|--------------|--------------|----------|--------------|--------------|--------------|--------------|--------------|--------------|---------------|----------|--------------|--------------|--------------|--------------|
|                                               | B            | S.E.         | Wald         | df       | Sig.         | Exp(B)       | 95% C.I.for  |              | B            | S.E.         | Wald          | df       | Sig.         | Exp(B)       | 95% C.I.for  |              |
|                                               |              |              |              |          |              |              | Lower        | Upper        |              |              |               |          |              |              | Lower        | Upper        |
| <b>Alcohol policy completely bans alcohol</b> |              |              |              |          |              |              |              |              |              |              |               |          |              |              |              |              |
| Yes (reference)                               |              |              | 0.378        | 3        | 0.945        |              |              |              |              |              | 13.146        | 3        | 0.004        |              |              |              |
| No                                            | <b>0.068</b> | <b>0.226</b> | <b>0.090</b> | <b>1</b> | <b>0.764</b> | <b>1.070</b> | <b>0.688</b> | <b>1.665</b> | <b>0.557</b> | <b>0.299</b> | <b>3.472</b>  | <b>1</b> | <b>0.062</b> | <b>1.745</b> | <b>0.972</b> | <b>3.133</b> |
| Don't know                                    | <b>0.085</b> | <b>0.221</b> | <b>0.146</b> | <b>1</b> | <b>0.702</b> | <b>1.088</b> | <b>0.706</b> | <b>1.679</b> | <b>0.904</b> | <b>0.264</b> | <b>11.684</b> | <b>1</b> | <b>0.001</b> | <b>2.469</b> | <b>1.471</b> | <b>4.146</b> |
| No policy                                     | <b>0.151</b> | <b>0.256</b> | <b>0.350</b> | <b>1</b> | <b>0.554</b> | <b>1.163</b> | <b>0.705</b> | <b>1.921</b> | <b>0.636</b> | <b>0.310</b> | <b>4.198</b>  | <b>1</b> | <b>0.040</b> | <b>1.888</b> | <b>1.028</b> | <b>3.468</b> |
| Adolescent alcohol use (1-8)                  | 0.169        | 0.051        | 10.787       | 1        | 0.001        | 1.184        | 1.071        | 1.310        | 0.290        | 0.086        | 11.272        | 1        | 0.001        | 1.336        | 1.128        | 1.583        |
| Male (0/1)                                    | 0.951        | 0.174        | 29.845       | 1        | 0.000        | 2.588        | 1.840        | 3.640        | 0.562        | 0.209        | 7.243         | 1        | 0.007        | 1.754        | 1.165        | 2.641        |
| White (0/1)                                   | -0.230       | 0.293        | 0.615        | 1        | 0.433        | 0.795        | 0.448        | 1.411        | -0.040       | 0.250        | 0.026         | 1        | 0.871        | 0.960        | 0.589        | 1.567        |
| 4-year college graduate (0/1)                 | 0.204        | 0.185        | 1.216        | 1        | 0.270        | 1.226        | 0.853        | 1.763        | -0.196       | 0.242        | 0.656         | 1        | 0.418        | 0.822        | 0.511        | 1.321        |
| Currently full-time student (0/1)             | -0.236       | 0.288        | 0.668        | 1        | 0.414        | 0.790        | 0.449        | 1.390        | -0.115       | 0.334        | 0.119         | 1        | 0.730        | 0.891        | 0.464        | 1.714        |
| Married (0/1)                                 | -2.100       | 0.738        | 8.098        | 1        | 0.004        | 0.122        | 0.029        | 0.520        | -0.599       | 0.310        | 3.742         | 1        | 0.053        | 0.549        | 0.299        | 1.008        |
| Has child or children (0/1)                   | -0.809       | 0.343        | 5.570        | 1        | 0.018        | 0.445        | 0.228        | 0.872        | -0.856       | 0.305        | 7.882         | 1        | 0.005        | 0.425        | 0.234        | 0.772        |
| Financial problems (0/1)                      | 0.258        | 0.206        | 1.567        | 1        | 0.211        | 1.294        | 0.864        | 1.939        | 0.044        | 0.222        | 0.040         | 1        | 0.841        | 1.045        | 0.677        | 1.615        |
| Months of full-time employment (1-12)         | 0.010        | 0.020        | 0.276        | 1        | 0.599        | 1.010        | 0.972        | 1.050        | -0.020       | 0.023        | 0.726         | 1        | 0.394        | 0.980        | 0.937        | 1.026        |
| High-risk industry (0/1)                      | 0.043        | 0.180        | 0.056        | 1        | 0.812        | 1.044        | 0.733        | 1.485        | 0.364        | 0.213        | 2.940         | 1        | 0.086        | 1.440        | 0.949        | 2.184        |
| Constant                                      | -1.746       | 0.421        | 17.238       | 1        | 0.000        | 0.174        |              |              | -2.403       | 0.433        | 30.739        | 1        | 0.000        | 0.090        |              |              |

  

| Table S12b. Model 2                            | Victoria      |              |               |          |              |              |              |              | Washington   |              |               |          |              |              |              |              |
|------------------------------------------------|---------------|--------------|---------------|----------|--------------|--------------|--------------|--------------|--------------|--------------|---------------|----------|--------------|--------------|--------------|--------------|
|                                                | B             | S.E.         | Wald          | df       | Sig.         | Exp(B)       | 95% C.I.for  |              | B            | S.E.         | Wald          | df       | Sig.         | Exp(B)       | 95% C.I.for  |              |
|                                                |               |              |               |          |              |              | Lower        | Upper        |              |              |               |          |              |              | Lower        | Upper        |
| <b>Alcohol policy completely bans alcohol</b>  |               |              |               |          |              |              |              |              |              |              |               |          |              |              |              |              |
| Yes (reference)                                |               |              | 0.538         | 3        | 0.910        |              |              |              |              |              | 7.901         | 3        | 0.048        |              |              |              |
| No                                             | <b>-0.158</b> | <b>0.235</b> | <b>0.455</b>  | <b>1</b> | <b>0.500</b> | <b>0.854</b> | <b>0.539</b> | <b>1.352</b> | <b>0.305</b> | <b>0.311</b> | <b>0.962</b>  | <b>1</b> | <b>0.327</b> | <b>1.356</b> | <b>0.738</b> | <b>2.495</b> |
| Don't know                                     | <b>-0.094</b> | <b>0.228</b> | <b>0.170</b>  | <b>1</b> | <b>0.680</b> | <b>0.910</b> | <b>0.583</b> | <b>1.423</b> | <b>0.772</b> | <b>0.275</b> | <b>7.894</b>  | <b>1</b> | <b>0.005</b> | <b>2.164</b> | <b>1.263</b> | <b>3.707</b> |
| No policy                                      | <b>-0.145</b> | <b>0.269</b> | <b>0.291</b>  | <b>1</b> | <b>0.589</b> | <b>0.865</b> | <b>0.510</b> | <b>1.466</b> | <b>0.292</b> | <b>0.329</b> | <b>0.785</b>  | <b>1</b> | <b>0.376</b> | <b>1.339</b> | <b>0.702</b> | <b>2.552</b> |
| <b>Alcohol use or impairment at work (0/1)</b> | <b>0.870</b>  | <b>0.192</b> | <b>20.454</b> | <b>1</b> | <b>0.000</b> | <b>2.387</b> | <b>1.637</b> | <b>3.481</b> | <b>1.427</b> | <b>0.254</b> | <b>31.524</b> | <b>1</b> | <b>0.000</b> | <b>4.165</b> | <b>2.531</b> | <b>6.854</b> |
| Adolescent alcohol use (1-8)                   | 0.145         | 0.053        | 7.600         | 1        | 0.006        | 1.156        | 1.043        | 1.282        | 0.273        | 0.090        | 9.265         | 1        | 0.002        | 1.314        | 1.102        | 1.567        |
| Male (0/1)                                     | 0.908         | 0.177        | 26.454        | 1        | 0.000        | 2.480        | 1.754        | 3.506        | 0.534        | 0.214        | 6.227         | 1        | 0.013        | 1.706        | 1.121        | 2.595        |
| White (0/1)                                    | -0.241        | 0.297        | 0.662         | 1        | 0.416        | 0.786        | 0.439        | 1.405        | -0.059       | 0.257        | 0.053         | 1        | 0.817        | 0.942        | 0.570        | 1.558        |
| 4-year college graduate (0/1)                  | 0.107         | 0.189        | 0.320         | 1        | 0.571        | 1.113        | 0.769        | 1.610        | -0.361       | 0.256        | 1.993         | 1        | 0.158        | 0.697        | 0.422        | 1.151        |
| Currently full-time student (0/1)              | -0.162        | 0.292        | 0.308         | 1        | 0.579        | 0.850        | 0.480        | 1.507        | -0.101       | 0.345        | 0.086         | 1        | 0.769        | 0.904        | 0.460        | 1.777        |
| Married (0/1)                                  | -2.058        | 0.742        | 7.697         | 1        | 0.006        | 0.128        | 0.030        | 0.546        | -0.503       | 0.317        | 2.514         | 1        | 0.113        | 0.605        | 0.324        | 1.126        |
| Has child or children (0/1)                    | -0.732        | 0.346        | 4.465         | 1        | 0.035        | 0.481        | 0.244        | 0.948        | -0.859       | 0.312        | 7.603         | 1        | 0.006        | 0.424        | 0.230        | 0.780        |
| Financial problems (0/1)                       | 0.279         | 0.209        | 1.793         | 1        | 0.181        | 1.322        | 0.878        | 1.991        | 0.160        | 0.230        | 0.484         | 1        | 0.487        | 1.174        | 0.747        | 1.844        |
| Months of full-time employment (1-12)          | 0.000         | 0.020        | 0.000         | 1        | 0.983        | 1.000        | 0.962        | 1.040        | -0.025       | 0.024        | 1.088         | 1        | 0.297        | 0.975        | 0.930        | 1.022        |
| High-risk industry (0/1)                       | 0.056         | 0.183        | 0.096         | 1        | 0.757        | 1.058        | 0.740        | 1.514        | 0.301        | 0.219        | 1.884         | 1        | 0.170        | 1.352        | 0.879        | 2.078        |
| Constant                                       | -1.653        | 0.423        | 15.284        | 1        | 0.000        | 0.191        |              |              | -2.465       | 0.446        | 30.568        | 1        | 0.000        | 0.085        |              |              |

**Table S12c. Model 3**

|                                               | Pooled Sample |              |              |          |              |              |                             |
|-----------------------------------------------|---------------|--------------|--------------|----------|--------------|--------------|-----------------------------|
|                                               | B             | S.E.         | Wald         | df       | Sig.         | Exp(B)       | 95% C.I. for<br>Lower Upper |
| State (1=VIC, 0=WA)                           | 0.277         | 0.151        | 3.342        | 1        | 0.068        | 1.319        | 0.980 1.774                 |
| <b>Alcohol policy completely bans alcohol</b> |               |              |              |          |              |              |                             |
| <b>Yes</b> (reference)                        |               |              | 2.521        | 3        | 0.472        |              |                             |
| <b>No</b>                                     | <b>0.089</b>  | <b>0.186</b> | <b>0.231</b> | <b>1</b> | <b>0.631</b> | <b>1.093</b> | <b>0.760 1.573</b>          |
| <b>Don't know</b>                             | <b>0.274</b>  | <b>0.174</b> | <b>2.471</b> | <b>1</b> | <b>0.116</b> | <b>1.315</b> | <b>0.935 1.851</b>          |
| <b>No policy</b>                              | <b>0.094</b>  | <b>0.207</b> | <b>0.208</b> | <b>1</b> | <b>0.648</b> | <b>1.099</b> | <b>0.733 1.649</b>          |
| Alcohol use or impairment at work (0/1)       | 0.179         | 0.045        | 15.902       | 1        | 0.000        | 1.196        | 1.095 1.305                 |
| Adolescent alcohol use (1-8)                  | 0.712         | 0.134        | 28.186       | 1        | 0.000        | 2.038        | 1.567 2.650                 |
| Male (0/1)                                    | -0.133        | 0.189        | 0.497        | 1        | 0.481        | 0.875        | 0.604 1.268                 |
| White (0/1)                                   | -0.050        | 0.148        | 0.115        | 1        | 0.734        | 0.951        | 0.712 1.271                 |
| 4-year college graduate (0/1)                 | -0.143        | 0.220        | 0.424        | 1        | 0.515        | 0.867        | 0.563 1.334                 |
| Currently full-time student (0/1)             | -0.857        | 0.278        | 9.495        | 1        | 0.002        | 0.424        | 0.246 0.732                 |
| Married (0/1)                                 | -0.793        | 0.227        | 12.199       | 1        | 0.000        | 0.452        | 0.290 0.706                 |
| Has child or children (0/1)                   | 0.212         | 0.153        | 1.923        | 1        | 0.166        | 1.236        | 0.916 1.666                 |
| Financial problems (0/1)                      | -0.010        | 0.015        | 0.443        | 1        | 0.506        | 0.990        | 0.961 1.020                 |
| Months of full-time employment (1-12)         | 0.201         | 0.138        | 2.140        | 1        | 0.143        | 1.223        | 0.934 1.602                 |
| High-risk industry (0/1)                      | 1.066         | 0.152        | 48.954       | 1        | 0.000        | 2.905        | 2.155 3.916                 |
| Constant                                      | -2.202        | 0.287        | 58.909       | 1        | 0.000        | 0.111        |                             |

**State x Alcohol Policy Interaction**

| B             | S.E.         | Wald         | df       | Sig.         | Exp(B)       | 95% C.I. for |              |
|---------------|--------------|--------------|----------|--------------|--------------|--------------|--------------|
|               |              |              |          |              |              | Lower        | Upper        |
|               |              | 7.945        | 3        | 0.047        |              |              |              |
| <b>-0.631</b> | <b>0.375</b> | <b>2.830</b> | <b>1</b> | <b>0.092</b> | <b>0.532</b> | <b>0.255</b> | <b>1.110</b> |
| <b>-0.917</b> | <b>0.343</b> | <b>7.138</b> | <b>1</b> | <b>0.008</b> | <b>0.400</b> | <b>0.204</b> | <b>0.783</b> |
| <b>-0.620</b> | <b>0.409</b> | <b>2.297</b> | <b>1</b> | <b>0.130</b> | <b>0.538</b> | <b>0.241</b> | <b>1.199</b> |

Tables S13a-c. Estimates from logistic regression of general high-risk drinking in the past year on alcohol-using co-workers and covariates

| Table S13a. Model 1                                   | Victoria     |              |               |          |              |              |              |              | Washington   |              |               |          |              |              |              |              |
|-------------------------------------------------------|--------------|--------------|---------------|----------|--------------|--------------|--------------|--------------|--------------|--------------|---------------|----------|--------------|--------------|--------------|--------------|
|                                                       | B            | S.E.         | Wald          | df       | Sig.         | Exp(B)       | 95% C.I. for |              | B            | S.E.         | Wald          | df       | Sig.         | Exp(B)       | 95% C.I. for |              |
|                                                       |              |              |               |          |              |              | Lower        | Upper        |              |              |               |          |              |              | Lower        | Upper        |
| <b>Co-workers drink at work or come to work drunk</b> | <b>0.681</b> | <b>0.174</b> | <b>15.361</b> | <b>1</b> | <b>0.000</b> | <b>1.976</b> | <b>1.406</b> | <b>2.777</b> | <b>0.879</b> | <b>0.214</b> | <b>16.952</b> | <b>1</b> | <b>0.000</b> | <b>2.410</b> | <b>1.585</b> | <b>3.662</b> |
| Adolescent alcohol use (1-8)                          | 0.161        | 0.052        | 9.637         | 1        | 0.002        | 1.174        | 1.061        | 1.300        | 0.243        | 0.086        | 7.926         | 1        | 0.005        | 1.274        | 1.076        | 1.509        |
| Male (0/1)                                            | 0.928        | 0.176        | 27.926        | 1        | 0.000        | 2.530        | 1.793        | 3.570        | 0.526        | 0.208        | 6.405         | 1        | 0.011        | 1.692        | 1.126        | 2.542        |
| White (0/1)                                           | -0.227       | 0.295        | 0.591         | 1        | 0.442        | 0.797        | 0.447        | 1.421        | -0.029       | 0.250        | 0.014         | 1        | 0.907        | 0.971        | 0.594        | 1.586        |
| 4-year college graduate (0/1)                         | 0.129        | 0.186        | 0.484         | 1        | 0.486        | 1.138        | 0.791        | 1.638        | -0.201       | 0.243        | 0.680         | 1        | 0.410        | 0.818        | 0.508        | 1.318        |
| Currently full-time student (0/1)                     | -0.212       | 0.292        | 0.527         | 1        | 0.468        | 0.809        | 0.457        | 1.433        | -0.175       | 0.337        | 0.271         | 1        | 0.602        | 0.839        | 0.434        | 1.623        |
| Married (0/1)                                         | -2.095       | 0.738        | 8.054         | 1        | 0.005        | 0.123        | 0.029        | 0.523        | -0.571       | 0.312        | 3.343         | 1        | 0.068        | 0.565        | 0.306        | 1.042        |
| Has child or children (0/1)                           | -0.800       | 0.345        | 5.375         | 1        | 0.020        | 0.449        | 0.229        | 0.884        | -0.809       | 0.307        | 6.949         | 1        | 0.008        | 0.445        | 0.244        | 0.813        |
| Financial problems (0/1)                              | 0.245        | 0.207        | 1.401         | 1        | 0.237        | 1.278        | 0.852        | 1.917        | 0.115        | 0.220        | 0.274         | 1        | 0.601        | 1.122        | 0.728        | 1.729        |
| Months of full-time employment (1-12)                 | 0.007        | 0.020        | 0.140         | 1        | 0.708        | 1.007        | 0.969        | 1.047        | -0.025       | 0.023        | 1.159         | 1        | 0.282        | 0.975        | 0.932        | 1.021        |
| High-risk industry (0/1)                              | -0.007       | 0.180        | 0.002         | 1        | 0.968        | 0.993        | 0.698        | 1.413        | 0.308        | 0.211        | 2.133         | 1        | 0.144        | 1.361        | 0.900        | 2.057        |
| Constant                                              | -1.807       | 0.399        | 20.459        | 1        | 0.000        | 0.164        |              |              | -2.181       | 0.423        | 26.555        | 1        | 0.000        | 0.113        |              |              |

| Table S13b. Model 2                                   | Victoria     |              |               |          |              |              |              |              | Washington   |              |               |          |              |              |              |              |
|-------------------------------------------------------|--------------|--------------|---------------|----------|--------------|--------------|--------------|--------------|--------------|--------------|---------------|----------|--------------|--------------|--------------|--------------|
|                                                       | B            | S.E.         | Wald          | df       | Sig.         | Exp(B)       | 95% C.I. for |              | B            | S.E.         | Wald          | df       | Sig.         | Exp(B)       | 95% C.I. for |              |
|                                                       |              |              |               |          |              |              | Lower        | Upper        |              |              |               |          |              |              | Lower        | Upper        |
| <b>Co-workers drink at work or come to work drunk</b> | <b>0.433</b> | <b>0.191</b> | <b>5.111</b>  | <b>1</b> | <b>0.024</b> | <b>1.541</b> | <b>1.059</b> | <b>2.243</b> | <b>0.379</b> | <b>0.248</b> | <b>2.348</b>  | <b>1</b> | <b>0.125</b> | <b>1.461</b> | <b>0.900</b> | <b>2.374</b> |
| <b>Alcohol use or impairment at work (0/1)</b>        | <b>0.654</b> | <b>0.201</b> | <b>10.532</b> | <b>1</b> | <b>0.001</b> | <b>1.923</b> | <b>1.296</b> | <b>2.854</b> | <b>1.297</b> | <b>0.277</b> | <b>21.888</b> | <b>1</b> | <b>0.000</b> | <b>3.659</b> | <b>2.125</b> | <b>6.301</b> |
| Adolescent alcohol use (1-8)                          | 0.149        | 0.052        | 8.088         | 1        | 0.004        | 1.161        | 1.047        | 1.286        | 0.251        | 0.089        | 7.980         | 1        | 0.005        | 1.286        | 1.080        | 1.530        |
| Male (0/1)                                            | 0.899        | 0.177        | 25.745        | 1        | 0.000        | 2.456        | 1.736        | 3.476        | 0.501        | 0.212        | 5.600         | 1        | 0.018        | 1.650        | 1.090        | 2.498        |
| White (0/1)                                           | -0.245       | 0.297        | 0.681         | 1        | 0.409        | 0.782        | 0.437        | 1.401        | 0.003        | 0.255        | 0.000         | 1        | 0.990        | 1.003        | 0.608        | 1.654        |
| 4-year college graduate (0/1)                         | 0.078        | 0.188        | 0.173         | 1        | 0.678        | 1.081        | 0.748        | 1.562        | -0.317       | 0.253        | 1.568         | 1        | 0.210        | 0.728        | 0.444        | 1.196        |
| Currently full-time student (0/1)                     | -0.157       | 0.293        | 0.287         | 1        | 0.592        | 0.855        | 0.481        | 1.518        | -0.147       | 0.343        | 0.184         | 1        | 0.668        | 0.863        | 0.441        | 1.689        |
| Married (0/1)                                         | -2.043       | 0.741        | 7.613         | 1        | 0.006        | 0.130        | 0.030        | 0.553        | -0.495       | 0.316        | 2.458         | 1        | 0.117        | 0.609        | 0.328        | 1.132        |
| Has child or children (0/1)                           | -0.745       | 0.347        | 4.615         | 1        | 0.032        | 0.475        | 0.240        | 0.937        | -0.843       | 0.312        | 7.322         | 1        | 0.007        | 0.430        | 0.234        | 0.793        |
| Financial problems (0/1)                              | 0.273        | 0.208        | 1.714         | 1        | 0.190        | 1.314        | 0.873        | 1.976        | 0.208        | 0.227        | 0.839         | 1        | 0.360        | 1.231        | 0.789        | 1.920        |
| Months of full-time employment (1-12)                 | 0.002        | 0.020        | 0.011         | 1        | 0.917        | 1.002        | 0.964        | 1.042        | -0.030       | 0.024        | 1.588         | 1        | 0.208        | 0.970        | 0.926        | 1.017        |
| High-risk industry (0/1)                              | 0.020        | 0.182        | 0.012         | 1        | 0.912        | 1.020        | 0.715        | 1.456        | 0.267        | 0.216        | 1.529         | 1        | 0.216        | 1.306        | 0.855        | 1.995        |
| Constant                                              | -1.811       | 0.401        | 20.447        | 1        | 0.000        | 0.163        |              |              | -2.265       | 0.432        | 27.536        | 1        | 0.000        | 0.104        |              |              |

**Table S13c. Model 3**

|                                                       | Pooled Sample |              |              |          |              |              | 95% C.I. for |              |
|-------------------------------------------------------|---------------|--------------|--------------|----------|--------------|--------------|--------------|--------------|
|                                                       | B             | S.E.         | Wald         | df       | Sig.         | Exp(B)       | Lower        | Upper        |
| State (1=VIC, 0=WA)                                   | 0.327         | 0.149        | 4.832        | 1        | 0.028        | 1.387        | 1.036        | 1.856        |
| <b>Co-workers drink at work or come to work drunk</b> | <b>0.450</b>  | <b>0.150</b> | <b>9.061</b> | <b>1</b> | <b>0.003</b> | <b>1.569</b> | <b>1.170</b> | <b>2.103</b> |
| Alcohol use or impairment at work (0/1)               | 0.889         | 0.162        | 30.148       | 1        | 0.000        | 2.433        | 1.771        | 3.341        |
| Adolescent alcohol use (1-8)                          | 0.170         | 0.045        | 14.574       | 1        | 0.000        | 1.186        | 1.086        | 1.294        |
| Male (0/1)                                            | 0.709         | 0.134        | 27.923       | 1        | 0.000        | 2.031        | 1.562        | 2.642        |
| White (0/1)                                           | -0.124        | 0.189        | 0.430        | 1        | 0.512        | 0.883        | 0.610        | 1.280        |
| 4-year college graduate (0/1)                         | -0.068        | 0.148        | 0.213        | 1        | 0.645        | 0.934        | 0.699        | 1.248        |
| Currently full-time student (0/1)                     | -0.143        | 0.220        | 0.419        | 1        | 0.517        | 0.867        | 0.563        | 1.335        |
| Married (0/1)                                         | -0.857        | 0.278        | 9.487        | 1        | 0.002        | 0.424        | 0.246        | 0.732        |
| Has child or children (0/1)                           | -0.799        | 0.228        | 12.254       | 1        | 0.000        | 0.450        | 0.288        | 0.704        |
| Financial problems (0/1)                              | 0.224         | 0.152        | 2.168        | 1        | 0.141        | 1.251        | 0.929        | 1.684        |
| Months of full-time employment (1-12)                 | -0.012        | 0.015        | 0.602        | 1        | 0.438        | 0.988        | 0.960        | 1.018        |
| High-risk industry (0/1)                              | 0.147         | 0.137        | 1.161        | 1        | 0.281        | 1.159        | 0.886        | 1.515        |
| Constant                                              | -2.179        | 0.279        | 61.155       | 1        | 0.000        | 0.113        |              |              |

**State x Co-workers Drink Interaction**

| B             | S.E.         | Wald         | df       | Sig.         | Exp(B)       | 95% C.I. for |              |
|---------------|--------------|--------------|----------|--------------|--------------|--------------|--------------|
|               |              |              |          |              |              | Lower        | Upper        |
| <b>-0.221</b> | <b>0.276</b> | <b>0.641</b> | <b>1</b> | <b>0.423</b> | <b>0.801</b> | <b>0.466</b> | <b>1.378</b> |



Tables S14a-c. Estimates from logistic regression of general high-risk drinking in the past year on workplace alcohol use attitudes and covariates

| Table S14a. Model 1                               | Victoria     |              |               |          |              |              |              |              | Washington   |              |               |          |              |              |              |              |
|---------------------------------------------------|--------------|--------------|---------------|----------|--------------|--------------|--------------|--------------|--------------|--------------|---------------|----------|--------------|--------------|--------------|--------------|
|                                                   | B            | S.E.         | Wald          | df       | Sig.         | Exp(B)       | 95% C.I. for |              | B            | S.E.         | Wald          | df       | Sig.         | Exp(B)       | 95% C.I. for |              |
|                                                   |              |              |               |          |              |              | Lower        | Upper        |              |              |               |          |              |              | Lower        | Upper        |
| <b>Workplace attitude toward drinking at work</b> |              |              |               |          |              |              |              |              |              |              |               |          |              |              |              |              |
| <b>Not acceptable</b> (reference)                 |              |              | 17.485        | 2        | 0.000        |              |              |              |              |              | 17.949        | 2        | 0.000        |              |              |              |
| <b>Discouraged</b>                                | <b>0.217</b> | <b>0.237</b> | <b>0.839</b>  | <b>1</b> | <b>0.360</b> | <b>1.242</b> | <b>0.781</b> | <b>1.977</b> | <b>0.718</b> | <b>0.281</b> | <b>6.510</b>  | <b>1</b> | <b>0.011</b> | <b>2.050</b> | <b>1.181</b> | <b>3.558</b> |
| <b>Tolerated or encouraged</b>                    | <b>0.962</b> | <b>0.230</b> | <b>17.477</b> | <b>1</b> | <b>0.000</b> | <b>2.618</b> | <b>1.667</b> | <b>4.111</b> | <b>1.227</b> | <b>0.323</b> | <b>14.454</b> | <b>1</b> | <b>0.000</b> | <b>3.411</b> | <b>1.812</b> | <b>6.420</b> |
| Adolescent alcohol use (1-8)                      | 0.165        | 0.052        | 10.203        | 1        | 0.001        | 1.180        | 1.066        | 1.306        | 0.239        | 0.087        | 7.546         | 1        | 0.006        | 1.270        | 1.071        | 1.506        |
| Male (0/1)                                        | 0.933        | 0.176        | 27.988        | 1        | 0.000        | 2.541        | 1.799        | 3.591        | 0.518        | 0.208        | 6.216         | 1        | 0.013        | 1.679        | 1.117        | 2.523        |
| White (0/1)                                       | -0.188       | 0.294        | 0.407         | 1        | 0.524        | 0.829        | 0.465        | 1.476        | 0.016        | 0.250        | 0.004         | 1        | 0.948        | 1.017        | 0.622        | 1.660        |
| 4-year college graduate (0/1)                     | 0.175        | 0.186        | 0.882         | 1        | 0.348        | 1.191        | 0.827        | 1.714        | -0.238       | 0.245        | 0.942         | 1        | 0.332        | 0.788        | 0.487        | 1.275        |
| Currently full-time student (0/1)                 | -0.191       | 0.291        | 0.428         | 1        | 0.513        | 0.826        | 0.467        | 1.463        | -0.245       | 0.337        | 0.529         | 1        | 0.467        | 0.783        | 0.405        | 1.515        |
| Married (0/1)                                     | -2.025       | 0.738        | 7.531         | 1        | 0.006        | 0.132        | 0.031        | 0.561        | -0.530       | 0.312        | 2.894         | 1        | 0.089        | 0.588        | 0.319        | 1.084        |
| Has child or children (0/1)                       | -0.754       | 0.344        | 4.792         | 1        | 0.029        | 0.471        | 0.240        | 0.924        | -0.812       | 0.306        | 7.027         | 1        | 0.008        | 0.444        | 0.244        | 0.809        |
| Financial problems (0/1)                          | 0.227        | 0.207        | 1.195         | 1        | 0.274        | 1.255        | 0.835        | 1.884        | 0.110        | 0.220        | 0.250         | 1        | 0.617        | 1.116        | 0.725        | 1.719        |
| Months of full-time employment (1-12)             | 0.005        | 0.020        | 0.062         | 1        | 0.804        | 1.005        | 0.967        | 1.044        | -0.028       | 0.023        | 1.453         | 1        | 0.228        | 0.972        | 0.929        | 1.018        |
| High-risk industry (0/1)                          | -0.048       | 0.182        | 0.070         | 1        | 0.792        | 0.953        | 0.668        | 1.361        | 0.293        | 0.212        | 1.912         | 1        | 0.167        | 1.341        | 0.885        | 2.033        |
| Constant                                          | -1.793       | 0.400        | 20.121        | 1        | 0.000        | 0.166        |              |              | -2.097       | 0.417        | 25.268        | 1        | 0.000        | 0.123        |              |              |

| Table S14b. Model 2                               | Victoria     |              |               |          |              |              |              |              | Washington   |              |               |          |              |              |              |              |
|---------------------------------------------------|--------------|--------------|---------------|----------|--------------|--------------|--------------|--------------|--------------|--------------|---------------|----------|--------------|--------------|--------------|--------------|
|                                                   | B            | S.E.         | Wald          | df       | Sig.         | Exp(B)       | 95% C.I. for |              | B            | S.E.         | Wald          | df       | Sig.         | Exp(B)       | 95% C.I. for |              |
|                                                   |              |              |               |          |              |              | Lower        | Upper        |              |              |               |          |              |              | Lower        | Upper        |
| <b>Workplace attitude toward drinking at work</b> |              |              |               |          |              |              |              |              |              |              |               |          |              |              |              |              |
| <b>Not acceptable</b> (reference)                 |              |              | 8.706         | 2        | 0.013        |              |              |              |              |              | 2.870         | 2        | 0.238        |              |              |              |
| <b>Discouraged</b>                                | <b>0.027</b> | <b>0.246</b> | <b>0.012</b>  | <b>1</b> | <b>0.913</b> | <b>1.027</b> | <b>0.634</b> | <b>1.665</b> | <b>0.338</b> | <b>0.302</b> | <b>1.256</b>  | <b>1</b> | <b>0.262</b> | <b>1.403</b> | <b>0.776</b> | <b>2.535</b> |
| <b>Tolerated or encouraged</b>                    | <b>0.702</b> | <b>0.244</b> | <b>8.311</b>  | <b>1</b> | <b>0.004</b> | <b>2.019</b> | <b>1.252</b> | <b>3.254</b> | <b>0.560</b> | <b>0.368</b> | <b>2.315</b>  | <b>1</b> | <b>0.128</b> | <b>1.750</b> | <b>0.851</b> | <b>3.597</b> |
| <b>Alcohol use or impairment at work (0/1)</b>    | <b>0.683</b> | <b>0.197</b> | <b>11.986</b> | <b>1</b> | <b>0.001</b> | <b>1.980</b> | <b>1.345</b> | <b>2.915</b> | <b>1.295</b> | <b>0.274</b> | <b>22.360</b> | <b>1</b> | <b>0.000</b> | <b>3.651</b> | <b>2.135</b> | <b>6.246</b> |
| Adolescent alcohol use (1-8)                      | 0.152        | 0.052        | 8.425         | 1        | 0.004        | 1.165        | 1.051        | 1.291        | 0.248        | 0.090        | 7.693         | 1        | 0.006        | 1.282        | 1.076        | 1.528        |
| Male (0/1)                                        | 0.904        | 0.178        | 25.814        | 1        | 0.000        | 2.469        | 1.742        | 3.499        | 0.500        | 0.212        | 5.576         | 1        | 0.018        | 1.649        | 1.089        | 2.498        |
| White (0/1)                                       | -0.214       | 0.297        | 0.519         | 1        | 0.471        | 0.807        | 0.451        | 1.446        | 0.017        | 0.255        | 0.005         | 1        | 0.946        | 1.017        | 0.617        | 1.678        |
| 4-year college graduate (0/1)                     | 0.097        | 0.189        | 0.262         | 1        | 0.609        | 1.101        | 0.761        | 1.594        | -0.331       | 0.254        | 1.695         | 1        | 0.193        | 0.718        | 0.437        | 1.182        |
| Currently full-time student (0/1)                 | -0.142       | 0.293        | 0.235         | 1        | 0.628        | 0.868        | 0.489        | 1.540        | -0.167       | 0.342        | 0.237         | 1        | 0.626        | 0.846        | 0.433        | 1.655        |
| Married (0/1)                                     | -1.996       | 0.740        | 7.275         | 1        | 0.007        | 0.136        | 0.032        | 0.579        | -0.482       | 0.316        | 2.334         | 1        | 0.127        | 0.617        | 0.333        | 1.146        |
| Has child or children (0/1)                       | -0.716       | 0.348        | 4.250         | 1        | 0.039        | 0.488        | 0.247        | 0.965        | -0.837       | 0.311        | 7.235         | 1        | 0.007        | 0.433        | 0.235        | 0.797        |
| Financial problems (0/1)                          | 0.260        | 0.209        | 1.543         | 1        | 0.214        | 1.296        | 0.861        | 1.953        | 0.205        | 0.227        | 0.816         | 1        | 0.366        | 1.228        | 0.787        | 1.915        |
| Months of full-time employment (1-12)             | 0.000        | 0.020        | 0.000         | 1        | 0.983        | 1.000        | 0.961        | 1.039        | -0.030       | 0.024        | 1.626         | 1        | 0.202        | 0.970        | 0.926        | 1.016        |
| High-risk industry (0/1)                          | -0.016       | 0.183        | 0.007         | 1        | 0.931        | 0.984        | 0.687        | 1.410        | 0.259        | 0.217        | 1.424         | 1        | 0.233        | 1.295        | 0.847        | 1.980        |
| Constant                                          | -1.801       | 0.402        | 20.092        | 1        | 0.000        | 0.165        |              |              | -2.236       | 0.430        | 27.023        | 1        | 0.000        | 0.107        |              |              |

**Table S14c. Model 3**

|                                                   | Pooled Sample |              |               |          |              |              |                             | State by Workplace Attitude Interaction |              |              |          |              |              |                             |
|---------------------------------------------------|---------------|--------------|---------------|----------|--------------|--------------|-----------------------------|-----------------------------------------|--------------|--------------|----------|--------------|--------------|-----------------------------|
|                                                   | B             | S.E.         | Wald          | df       | Sig.         | Exp(B)       | 95% C.I. for<br>Lower Upper | B                                       | S.E.         | Wald         | df       | Sig.         | Exp(B)       | 95% C.I. for<br>Lower Upper |
| State (1=VIC, 0=WA)                               | 0.285         | 0.149        | 3.660         | 1        | 0.056        | 1.330        | 0.993 1.781                 |                                         |              |              |          |              |              |                             |
| <b>Workplace attitude toward drinking at work</b> |               |              |               |          |              |              |                             |                                         |              |              |          |              |              |                             |
| <b>Not acceptable</b> (reference)                 |               |              | 11.999        | 2        | 0.002        |              |                             |                                         |              | 1.923        | 2        | 0.382        |              |                             |
| <b>Discouraged</b>                                | <b>0.184</b>  | <b>0.190</b> | <b>0.935</b>  | <b>1</b> | <b>0.333</b> | <b>1.202</b> | <b>0.828 1.743</b>          | <b>-0.514</b>                           | <b>0.371</b> | <b>1.917</b> | <b>1</b> | <b>0.166</b> | <b>0.598</b> | <b>0.289 1.238</b>          |
| <b>Tolerated or encouraged</b>                    | <b>0.690</b>  | <b>0.199</b> | <b>11.987</b> | <b>1</b> | <b>0.001</b> | <b>1.994</b> | <b>1.349 2.947</b>          | <b>-0.129</b>                           | <b>0.400</b> | <b>0.103</b> | <b>1</b> | <b>0.748</b> | <b>0.879</b> | <b>0.401 1.927</b>          |
| Alcohol use or impairment at work (0/1)           | 0.911         | 0.159        | 32.839        | 1        | 0.000        | 2.487        | 1.821 3.395                 |                                         |              |              |          |              |              |                             |
| Adolescent alcohol use (1-8)                      | 0.172         | 0.045        | 14.805        | 1        | 0.000        | 1.188        | 1.088 1.296                 |                                         |              |              |          |              |              |                             |
| Male (0/1)                                        | 0.706         | 0.134        | 27.615        | 1        | 0.000        | 2.026        | 1.557 2.636                 |                                         |              |              |          |              |              |                             |
| White (0/1)                                       | -0.098        | 0.190        | 0.267         | 1        | 0.605        | 0.907        | 0.625 1.315                 |                                         |              |              |          |              |              |                             |
| 4-year college graduate (0/1)                     | -0.057        | 0.148        | 0.148         | 1        | 0.700        | 0.945        | 0.707 1.262                 |                                         |              |              |          |              |              |                             |
| Currently full-time student (0/1)                 | -0.137        | 0.219        | 0.387         | 1        | 0.534        | 0.872        | 0.567 1.341                 |                                         |              |              |          |              |              |                             |
| Married (0/1)                                     | -0.831        | 0.278        | 8.926         | 1        | 0.003        | 0.436        | 0.252 0.751                 |                                         |              |              |          |              |              |                             |
| Has child or children (0/1)                       | -0.791        | 0.228        | 11.984        | 1        | 0.001        | 0.454        | 0.290 0.710                 |                                         |              |              |          |              |              |                             |
| Financial problems (0/1)                          | 0.218         | 0.152        | 2.062         | 1        | 0.151        | 1.244        | 0.923 1.676                 |                                         |              |              |          |              |              |                             |
| Months of full-time employment (1-12)             | -0.013        | 0.015        | 0.788         | 1        | 0.375        | 0.987        | 0.958 1.016                 |                                         |              |              |          |              |              |                             |
| High-risk industry (0/1)                          | 0.130         | 0.138        | 0.890         | 1        | 0.345        | 1.139        | 0.869 1.491                 |                                         |              |              |          |              |              |                             |
| Constant                                          | -2.136        | 0.278        | 59.056        | 1        | 0.000        | 0.118        |                             |                                         |              |              |          |              |              |                             |

Tables S15a-b. Estimates from logistic regression of general high-risk drinking in the past year on ALL workplace alcohol environment variables

| Table S15a                                            | Victoria |       |        |    |       |        |              |       | Washington |       |        |    |       |        |              |       |
|-------------------------------------------------------|----------|-------|--------|----|-------|--------|--------------|-------|------------|-------|--------|----|-------|--------|--------------|-------|
|                                                       | B        | S.E.  | Wald   | df | Sig.  | Exp(B) | 95% C.I. for |       | B          | S.E.  | Wald   | df | Sig.  | Exp(B) | 95% C.I. for |       |
|                                                       |          |       |        |    |       |        | Lower        | Upper |            |       |        |    |       |        | Lower        | Upper |
| Alcohol available in the workplace                    | -0.071   | 0.195 | 0.132  | 1  | 0.716 | 0.931  | 0.635        | 1.366 | 0.267      | 0.278 | 0.920  | 1  | 0.338 | 1.306  | 0.757        | 2.253 |
| <b>Workplace has alcohol policy</b>                   |          |       |        |    |       |        |              |       |            |       |        |    |       |        |              |       |
| <b>Yes</b> (reference)                                |          |       | 0.329  | 2  | 0.848 |        |              |       |            |       | 5.555  | 2  | 0.062 |        |              |       |
| <b>No</b>                                             | -0.142   | 0.251 | 0.322  | 1  | 0.570 | 0.867  | 0.530        | 1.419 | 0.046      | 0.335 | 0.019  | 1  | 0.890 | 1.047  | 0.543        | 2.020 |
| <b>Don't know</b>                                     | -0.048   | 0.203 | 0.055  | 1  | 0.815 | 0.954  | 0.641        | 1.419 | 0.619      | 0.269 | 5.299  | 1  | 0.021 | 1.857  | 1.096        | 3.147 |
| <b>Workplace attitude toward drinking at work</b>     |          |       |        |    |       |        |              |       |            |       |        |    |       |        |              |       |
| <b>Not acceptable</b> (reference)                     |          |       | 6.789  | 2  | 0.034 |        |              |       |            |       | 0.507  | 2  | 0.776 |        |              |       |
| <b>Discouraged</b>                                    | -0.032   | 0.256 | 0.016  | 1  | 0.901 | 0.968  | 0.586        | 1.601 | 0.108      | 0.319 | 0.115  | 1  | 0.735 | 1.114  | 0.596        | 2.083 |
| <b>Tolerated or encouraged</b>                        | 0.628    | 0.258 | 5.942  | 1  | 0.015 | 1.874  | 1.131        | 3.105 | 0.286      | 0.406 | 0.496  | 1  | 0.481 | 1.331  | 0.601        | 2.951 |
| <b>Co-workers drink at work or come to work drunk</b> | 0.337    | 0.202 | 2.765  | 1  | 0.096 | 1.400  | 0.942        | 2.083 | 0.269      | 0.264 | 1.041  | 1  | 0.308 | 1.309  | 0.781        | 2.193 |
| Alcohol use or impairment at work (0/1)               | 0.609    | 0.221 | 7.569  | 1  | 0.006 | 1.838  | 1.191        | 2.835 | 1.121      | 0.309 | 13.152 | 1  | 0.000 | 3.069  | 1.674        | 5.625 |
| Adolescent alcohol use (1-8)                          | 0.147    | 0.053 | 7.691  | 1  | 0.006 | 1.159  | 1.044        | 1.286 | 0.251      | 0.091 | 7.643  | 1  | 0.006 | 1.286  | 1.076        | 1.536 |
| Male (0/1)                                            | 0.901    | 0.178 | 25.517 | 1  | 0.000 | 2.463  | 1.736        | 3.494 | 0.567      | 0.215 | 6.929  | 1  | 0.008 | 1.762  | 1.156        | 2.688 |
| White (0/1)                                           | -0.207   | 0.300 | 0.478  | 1  | 0.489 | 0.813  | 0.452        | 1.462 | -0.073     | 0.259 | 0.078  | 1  | 0.779 | 0.930  | 0.560        | 1.545 |
| 4-year college graduate (0/1)                         | 0.066    | 0.191 | 0.118  | 1  | 0.731 | 1.068  | 0.735        | 1.552 | -0.396     | 0.257 | 2.371  | 1  | 0.124 | 0.673  | 0.407        | 1.114 |
| Currently full-time student (0/1)                     | -0.154   | 0.295 | 0.273  | 1  | 0.601 | 0.857  | 0.481        | 1.528 | -0.135     | 0.345 | 0.152  | 1  | 0.696 | 0.874  | 0.444        | 1.720 |
| Married (0/1)                                         | -2.011   | 0.741 | 7.362  | 1  | 0.007 | 0.134  | 0.031        | 0.572 | -0.494     | 0.318 | 2.411  | 1  | 0.120 | 0.610  | 0.327        | 1.138 |
| Has child or children (0/1)                           | -0.727   | 0.350 | 4.315  | 1  | 0.038 | 0.484  | 0.244        | 0.960 | -0.834     | 0.313 | 7.090  | 1  | 0.008 | 0.434  | 0.235        | 0.802 |
| Financial problems (0/1)                              | 0.238    | 0.211 | 1.279  | 1  | 0.258 | 1.269  | 0.840        | 1.918 | 0.203      | 0.231 | 0.771  | 1  | 0.380 | 1.225  | 0.779        | 1.925 |
| Months of full-time employment (1-12)                 | -0.002   | 0.020 | 0.007  | 1  | 0.935 | 0.998  | 0.960        | 1.039 | -0.024     | 0.024 | 0.946  | 1  | 0.331 | 0.977  | 0.932        | 1.024 |
| High-risk industry (0/1)                              | -0.038   | 0.187 | 0.042  | 1  | 0.838 | 0.963  | 0.668        | 1.387 | 0.264      | 0.220 | 1.449  | 1  | 0.229 | 1.302  | 0.847        | 2.003 |
| Constant                                              | -1.757   | 0.417 | 17.711 | 1  | 0.000 | 0.173  |              |       | -2.452     | 0.443 | 30.577 | 1  | 0.000 | 0.086  |              |       |

| Table S15b                                     | Pooled Sample |              |              |          |              |              |              |              | State Interactions <sup>a</sup> |              |              |          |              |              |              |              |
|------------------------------------------------|---------------|--------------|--------------|----------|--------------|--------------|--------------|--------------|---------------------------------|--------------|--------------|----------|--------------|--------------|--------------|--------------|
|                                                | B             | S.E.         | Wald         | df       | Sig.         | Exp(B)       | 95% C.I. for |              | B                               | S.E.         | Wald         | df       | Sig.         | Exp(B)       | 95% C.I. for |              |
|                                                |               |              |              |          |              |              | Lower        | Upper        |                                 |              |              |          |              |              | Lower        | Upper        |
| State (1=VIC, 0=WA)                            | 0.278         | 0.152        | 3.331        | 1        | 0.068        | 1.320        | 0.980        | 1.779        |                                 |              |              |          |              |              |              |              |
| Alcohol available in the workplace             | <b>0.053</b>  | <b>0.159</b> | <b>0.113</b> | <b>1</b> | <b>0.737</b> | <b>1.055</b> | <b>0.773</b> | <b>1.440</b> | <b>-0.518</b>                   | <b>0.286</b> | <b>3.276</b> | <b>1</b> | <b>0.070</b> | <b>0.596</b> | <b>0.340</b> | <b>1.044</b> |
| Workplace has alcohol policy                   |               |              |              |          |              |              |              |              |                                 |              |              |          |              |              |              |              |
| Yes (reference)                                |               |              | 1.832        | 2        | 0.400        |              |              |              |                                 |              | 4.242        | 2        | 0.120        |              |              |              |
| No                                             | <b>-0.068</b> | <b>0.199</b> | <b>0.116</b> | <b>1</b> | <b>0.733</b> | <b>0.934</b> | <b>0.633</b> | <b>1.379</b> | <b>-0.319</b>                   | <b>0.394</b> | <b>0.656</b> | <b>1</b> | <b>0.418</b> | <b>0.727</b> | <b>0.335</b> | <b>1.574</b> |
| Don't know                                     | <b>0.188</b>  | <b>0.161</b> | <b>1.374</b> | <b>1</b> | <b>0.241</b> | <b>1.207</b> | <b>0.881</b> | <b>1.654</b> | <b>-0.653</b>                   | <b>0.321</b> | <b>4.136</b> | <b>1</b> | <b>0.042</b> | <b>0.520</b> | <b>0.277</b> | <b>0.977</b> |
| Workplace attitude toward drinking at work     |               |              |              |          |              |              |              |              |                                 |              |              |          |              |              |              |              |
| Not acceptable (reference)                     |               |              | 7.209        | 2        | 0.027        |              |              |              |                                 |              | 1.605        | 2        | 0.448        |              |              |              |
| Discouraged                                    | <b>0.071</b>  | <b>0.198</b> | <b>0.128</b> | <b>1</b> | <b>0.721</b> | <b>1.073</b> | <b>0.728</b> | <b>1.583</b> | <b>-0.473</b>                   | <b>0.374</b> | <b>1.602</b> | <b>1</b> | <b>0.206</b> | <b>0.623</b> | <b>0.300</b> | <b>1.296</b> |
| Tolerated or encouraged                        | <b>0.561</b>  | <b>0.213</b> | <b>6.954</b> | <b>1</b> | <b>0.008</b> | <b>1.752</b> | <b>1.155</b> | <b>2.658</b> | <b>-0.113</b>                   | <b>0.404</b> | <b>0.078</b> | <b>1</b> | <b>0.780</b> | <b>0.893</b> | <b>0.404</b> | <b>1.974</b> |
| Co-workers drink at work or come to work drunk | <b>0.349</b>  | <b>0.158</b> | <b>4.878</b> | <b>1</b> | <b>0.027</b> | <b>1.418</b> | <b>1.040</b> | <b>1.933</b> | <b>-0.237</b>                   | <b>0.279</b> | <b>0.721</b> | <b>1</b> | <b>0.396</b> | <b>0.789</b> | <b>0.457</b> | <b>1.363</b> |
| Alcohol use or impairment at work (0/1)        | 0.771         | 0.178        | 18.792       | 1        | 0.000        | 2.163        | 1.526        | 3.065        |                                 |              |              |          |              |              |              |              |
| Adolescent alcohol use (1-8)                   | 0.171         | 0.045        | 14.470       | 1        | 0.000        | 1.187        | 1.087        | 1.297        |                                 |              |              |          |              |              |              |              |
| Male (0/1)                                     | 0.714         | 0.135        | 28.054       | 1        | 0.000        | 2.043        | 1.568        | 2.661        |                                 |              |              |          |              |              |              |              |
| White (0/1)                                    | -0.129        | 0.191        | 0.458        | 1        | 0.498        | 0.879        | 0.605        | 1.277        |                                 |              |              |          |              |              |              |              |
| 4-year college graduate (0/1)                  | -0.086        | 0.149        | 0.330        | 1        | 0.565        | 0.918        | 0.686        | 1.229        |                                 |              |              |          |              |              |              |              |
| Currently full-time student (0/1)              | -0.148        | 0.221        | 0.451        | 1        | 0.502        | 0.862        | 0.559        | 1.329        |                                 |              |              |          |              |              |              |              |
| Married (0/1)                                  | -0.852        | 0.280        | 9.286        | 1        | 0.002        | 0.426        | 0.247        | 0.738        |                                 |              |              |          |              |              |              |              |
| Has child or children (0/1)                    | -0.771        | 0.229        | 11.311       | 1        | 0.001        | 0.463        | 0.295        | 0.725        |                                 |              |              |          |              |              |              |              |
| Financial problems (0/1)                       | 0.208         | 0.153        | 1.832        | 1        | 0.176        | 1.231        | 0.911        | 1.662        |                                 |              |              |          |              |              |              |              |
| Months of full-time employment (1-12)          | -0.011        | 0.015        | 0.527        | 1        | 0.468        | 0.989        | 0.960        | 1.019        |                                 |              |              |          |              |              |              |              |
| High-risk industry (0/1)                       | 0.132         | 0.139        | 0.899        | 1        | 0.343        | 1.141        | 0.869        | 1.498        |                                 |              |              |          |              |              |              |              |
| Constant                                       | -2.221        | 0.286        | 60.380       | 1        | 0.000        | 0.108        |              |              |                                 |              |              |          |              |              |              |              |

Note: <sup>a</sup> Only one interaction between state and each of the workplace alcohol environment variables was included in the model at a time.

Table S16a-b. Estimates from logistic regression of general high-risk drinking in the past year on ALL workplace alcohol environment variables

| Table S16a                                     | Victoria |       |        |    |       |        |              |       | Washington |       |        |    |       |        |              |       |
|------------------------------------------------|----------|-------|--------|----|-------|--------|--------------|-------|------------|-------|--------|----|-------|--------|--------------|-------|
|                                                | B        | S.E.  | Wald   | df | Sig.  | Exp(B) | 95% C.I. for |       | B          | S.E.  | Wald   | df | Sig.  | Exp(B) | 95% C.I. for |       |
|                                                |          |       |        |    |       |        | Lower        | Upper |            |       |        |    |       |        | Lower        | Upper |
| Alcohol available in the workplace             | -0.012   | 0.204 | 0.004  | 1  | 0.952 | 0.988  | 0.663        | 1.473 | 0.223      | 0.288 | 0.599  | 1  | 0.439 | 1.249  | 0.711        | 2.195 |
| Alcohol policy completely bans alcohol         |          |       |        |    |       |        |              |       |            |       |        |    |       |        |              |       |
| Yes (reference)                                |          |       | 1.395  | 3  | 0.707 |        |              |       |            |       | 6.213  | 3  | 0.102 |        |              |       |
| No                                             | -0.256   | 0.249 | 1.060  | 1  | 0.303 | 0.774  | 0.475        | 1.261 | 0.241      | 0.321 | 0.565  | 1  | 0.452 | 1.273  | 0.679        | 2.386 |
| Don't know                                     | -0.172   | 0.235 | 0.531  | 1  | 0.466 | 0.842  | 0.531        | 1.336 | 0.693      | 0.284 | 5.963  | 1  | 0.015 | 1.999  | 1.146        | 3.485 |
| No policy                                      | -0.269   | 0.279 | 0.924  | 1  | 0.336 | 0.765  | 0.442        | 1.322 | 0.133      | 0.351 | 0.144  | 1  | 0.705 | 1.142  | 0.574        | 2.275 |
| Workplace attitude toward drinking at work     |          |       |        |    |       |        |              |       |            |       |        |    |       |        |              |       |
| Not acceptable (reference)                     |          |       | 7.193  | 2  | 0.027 |        |              |       |            |       | 0.541  | 2  | 0.763 |        |              |       |
| Discouraged                                    | -0.018   | 0.257 | 0.005  | 1  | 0.945 | 0.982  | 0.593        | 1.626 | 0.117      | 0.319 | 0.135  | 1  | 0.713 | 1.124  | 0.602        | 2.099 |
| Tolerated or encouraged                        | 0.655    | 0.259 | 6.379  | 1  | 0.012 | 1.926  | 1.158        | 3.203 | 0.294      | 0.405 | 0.525  | 1  | 0.469 | 1.341  | 0.606        | 2.967 |
| Co-workers drink at work or come to work drunk | 0.334    | 0.203 | 2.717  | 1  | 0.099 | 1.397  | 0.939        | 2.079 | 0.287      | 0.264 | 1.183  | 1  | 0.277 | 1.333  | 0.794        | 2.237 |
| Alcohol use or impairment at work (0/1)        | 0.622    | 0.222 | 7.858  | 1  | 0.005 | 1.863  | 1.206        | 2.878 | 1.098      | 0.309 | 12.605 | 1  | 0.000 | 2.999  | 1.636        | 5.500 |
| Adolescent alcohol use (1-8)                   | 0.145    | 0.053 | 7.382  | 1  | 0.007 | 1.156  | 1.041        | 1.283 | 0.243      | 0.092 | 7.032  | 1  | 0.008 | 1.275  | 1.065        | 1.526 |
| Male (0/1)                                     | 0.900    | 0.178 | 25.435 | 1  | 0.000 | 2.460  | 1.734        | 3.490 | 0.557      | 0.216 | 6.665  | 1  | 0.010 | 1.746  | 1.144        | 2.666 |
| White (0/1)                                    | -0.202   | 0.299 | 0.455  | 1  | 0.500 | 0.817  | 0.454        | 1.469 | -0.096     | 0.259 | 0.136  | 1  | 0.713 | 0.909  | 0.547        | 1.511 |
| 4-year college graduate (0/1)                  | 0.078    | 0.191 | 0.167  | 1  | 0.683 | 1.081  | 0.743        | 1.573 | -0.389     | 0.257 | 2.287  | 1  | 0.130 | 0.678  | 0.410        | 1.122 |
| Currently full-time student (0/1)              | -0.154   | 0.295 | 0.273  | 1  | 0.601 | 0.857  | 0.481        | 1.528 | -0.122     | 0.346 | 0.124  | 1  | 0.724 | 0.885  | 0.449        | 1.743 |
| Married (0/1)                                  | -2.021   | 0.742 | 7.416  | 1  | 0.006 | 0.133  | 0.031        | 0.568 | -0.501     | 0.319 | 2.456  | 1  | 0.117 | 0.606  | 0.324        | 1.134 |
| Has child or children (0/1)                    | -0.715   | 0.351 | 4.148  | 1  | 0.042 | 0.489  | 0.246        | 0.973 | -0.815     | 0.313 | 6.762  | 1  | 0.009 | 0.443  | 0.239        | 0.818 |
| Financial problems (0/1)                       | 0.225    | 0.211 | 1.136  | 1  | 0.287 | 1.253  | 0.828        | 1.896 | 0.189      | 0.233 | 0.661  | 1  | 0.416 | 1.208  | 0.766        | 1.905 |
| Months of full-time employment (1-12)          | -0.004   | 0.020 | 0.031  | 1  | 0.860 | 0.996  | 0.958        | 1.037 | -0.024     | 0.024 | 0.988  | 1  | 0.320 | 0.976  | 0.931        | 1.024 |
| High-risk industry (0/1)                       | -0.038   | 0.187 | 0.042  | 1  | 0.838 | 0.962  | 0.667        | 1.388 | 0.266      | 0.221 | 1.447  | 1  | 0.229 | 1.305  | 0.846        | 2.012 |
| Constant                                       | -1.661   | 0.427 | 15.149 | 1  | 0.000 | 0.190  |              |       | -2.475     | 0.450 | 30.232 | 1  | 0.000 | 0.084  |              |       |

| Table S16b                                     | Pooled Sample |              |              |          |              |              |              |              | State Interactions <sup>a</sup> |              |              |          |              |              |              |              |
|------------------------------------------------|---------------|--------------|--------------|----------|--------------|--------------|--------------|--------------|---------------------------------|--------------|--------------|----------|--------------|--------------|--------------|--------------|
|                                                | B             | S.E.         | Wald         | df       | Sig.         | Exp(B)       | 95% C.I. for |              | B                               | S.E.         | Wald         | df       | Sig.         | Exp(B)       | 95% C.I. for |              |
|                                                |               |              |              |          |              |              | Lower        | Upper        |                                 |              |              |          |              |              | Lower        | Upper        |
| State (1=VIC, 0=WA)                            | 0.285         | 0.153        | 3.464        | 1        | 0.063        | 1.330        | 0.985        | 1.797        |                                 |              |              |          |              |              |              |              |
| Alcohol available in the workplace             | <b>0.055</b>  | <b>0.165</b> | <b>0.111</b> | <b>1</b> | <b>0.740</b> | <b>1.056</b> | <b>0.765</b> | <b>1.459</b> | <b>-0.528</b>                   | <b>0.286</b> | <b>3.410</b> | <b>1</b> | <b>0.065</b> | <b>0.590</b> | <b>0.336</b> | <b>1.033</b> |
| Alcohol policy completely bans alcohol         |               |              |              |          |              |              |              |              |                                 |              |              |          |              |              |              |              |
| Yes (reference)                                |               |              | 1.868        | 3        | 0.600        |              |              |              |                                 |              | 7.874        | 3        | 0.049        |              |              |              |
| No                                             | <b>-0.062</b> | <b>0.216</b> | <b>0.082</b> | <b>1</b> | <b>0.774</b> | <b>0.940</b> | <b>0.615</b> | <b>1.436</b> | <b>-0.707</b>                   | <b>0.376</b> | <b>3.532</b> | <b>1</b> | <b>0.060</b> | <b>0.493</b> | <b>0.236</b> | <b>1.031</b> |
| Don't know                                     | <b>0.194</b>  | <b>0.180</b> | <b>1.168</b> | <b>1</b> | <b>0.280</b> | <b>1.214</b> | <b>0.854</b> | <b>1.727</b> | <b>-0.905</b>                   | <b>0.347</b> | <b>6.777</b> | <b>1</b> | <b>0.009</b> | <b>0.405</b> | <b>0.205</b> | <b>0.800</b> |
| No policy                                      | <b>0.007</b>  | <b>0.194</b> | <b>0.001</b> | <b>1</b> | <b>0.971</b> | <b>1.007</b> | <b>0.688</b> | <b>1.474</b> | <b>-0.562</b>                   | <b>0.415</b> | <b>1.840</b> | <b>1</b> | <b>0.175</b> | <b>0.570</b> | <b>0.253</b> | <b>1.284</b> |
| Workplace attitude toward drinking at work     |               |              |              |          |              |              |              |              |                                 |              |              |          |              |              |              |              |
| Not acceptable (reference)                     |               |              | 7.149        | 2        | 0.028        |              |              |              |                                 |              | 1.663        | 2        | 0.435        |              |              |              |
| Discouraged                                    | <b>0.073</b>  | <b>0.198</b> | <b>0.134</b> | <b>1</b> | <b>0.714</b> | <b>1.075</b> | <b>0.729</b> | <b>1.586</b> | <b>-0.481</b>                   | <b>0.374</b> | <b>1.658</b> | <b>1</b> | <b>0.198</b> | <b>0.618</b> | <b>0.297</b> | <b>1.286</b> |
| Tolerated or encouraged                        | <b>0.560</b>  | <b>0.213</b> | <b>6.901</b> | <b>1</b> | <b>0.009</b> | <b>1.750</b> | <b>1.153</b> | <b>2.657</b> | <b>-0.120</b>                   | <b>0.405</b> | <b>0.088</b> | <b>1</b> | <b>0.767</b> | <b>0.887</b> | <b>0.401</b> | <b>1.960</b> |
| Co-workers drink at work or come to work drunk | <b>0.354</b>  | <b>0.158</b> | <b>4.998</b> | <b>1</b> | <b>0.025</b> | <b>1.424</b> | <b>1.045</b> | <b>1.942</b> | <b>-0.251</b>                   | <b>0.279</b> | <b>0.807</b> | <b>1</b> | <b>0.369</b> | <b>0.778</b> | <b>0.450</b> | <b>1.345</b> |
| Alcohol use or impairment at work (0/1)        | 0.770         | 0.178        | 18.694       | 1        | 0.000        | 2.160        | 1.524        | 3.063        |                                 |              |              |          |              |              |              |              |
| Adolescent alcohol use (1-8)                   | 0.169         | 0.045        | 14.051       | 1        | 0.000        | 1.184        | 1.084        | 1.294        |                                 |              |              |          |              |              |              |              |
| Male (0/1)                                     | 0.710         | 0.135        | 27.637       | 1        | 0.000        | 2.034        | 1.561        | 2.650        |                                 |              |              |          |              |              |              |              |
| White (0/1)                                    | -0.135        | 0.191        | 0.496        | 1        | 0.481        | 0.874        | 0.601        | 1.271        |                                 |              |              |          |              |              |              |              |
| 4-year college graduate (0/1)                  | -0.083        | 0.149        | 0.313        | 1        | 0.576        | 0.920        | 0.687        | 1.232        |                                 |              |              |          |              |              |              |              |
| Currently full-time student (0/1)              | -0.147        | 0.221        | 0.441        | 1        | 0.507        | 0.864        | 0.560        | 1.332        |                                 |              |              |          |              |              |              |              |
| Married (0/1)                                  | -0.845        | 0.280        | 9.132        | 1        | 0.003        | 0.429        | 0.248        | 0.743        |                                 |              |              |          |              |              |              |              |
| Has child or children (0/1)                    | -0.762        | 0.229        | 11.031       | 1        | 0.001        | 0.467        | 0.298        | 0.732        |                                 |              |              |          |              |              |              |              |
| Financial problems (0/1)                       | 0.196         | 0.154        | 1.629        | 1        | 0.202        | 1.217        | 0.900        | 1.646        |                                 |              |              |          |              |              |              |              |
| Months of full-time employment (1-12)          | -0.011        | 0.015        | 0.570        | 1        | 0.450        | 0.989        | 0.960        | 1.019        |                                 |              |              |          |              |              |              |              |
| High-risk industry (0/1)                       | 0.139         | 0.139        | 0.989        | 1        | 0.320        | 1.149        | 0.874        | 1.510        |                                 |              |              |          |              |              |              |              |
| Constant                                       | -2.220        | 0.290        | 58.568       | 1        | 0.000        | 0.109        |              |              |                                 |              |              |          |              |              |              |              |

Note: <sup>a</sup> Only one interaction between state and each of the workplace alcohol environment variables was included in the model at a time.
