# Supplementary material for: Alcohol-Tolerant Workplace Environments Are a Risk Factor for Young Adult Alcohol Misuse on and off the Job in Australia and the United States
Source: MDPI journal article supplement (doi:10.3390/ijerph20186725), 2023-09-07
Supplement: s1 [file s1]

**Supplemental Table S1. Baseline (Grade 7, 2002) characteristics of the analysis sample and the original sample by state**

|                                                  | Victoria, Australia          |                 | Washington, USA              |                 |
|--------------------------------------------------|------------------------------|-----------------|------------------------------|-----------------|
|                                                  | Analysis Sample <sup>a</sup> | Original Sample | Analysis Sample <sup>a</sup> | Original Sample |
|                                                  | n = 777                      | n = 984         | n = 751                      | n = 961         |
| Male, %                                          | 48.3                         | 50.8            | 46.7                         | 49.1            |
| White/Australian, %                              | 91.7                         | 90.6            | 69.1                         | 64.9            |
| Age, mean                                        | 12.9                         | 12.9            | 13.1                         | 13.1            |
| Parental education <sup>b</sup> , mean           | 2.1                          | 2.0             | 2.5                          | 2.4             |
| Religious service attendance <sup>c</sup> , mean | 2.2                          | 2.1             | 2.7                          | 2.7             |
| Grades in school <sup>d</sup> , mean             | 1.8                          | 1.8             | 2.2                          | 2.2             |
| Used alcohol past year, %                        | 37.4                         | 39.2            | 20.5                         | 21.1            |

Notes:

<sup>a</sup> The analysis sample does not include those surveyed at age 25 but not currently working (n = 89 in Victoria and n = 90 in Washington) and those who did not complete an age 25 survey (n = 118 in Victoria and n = 120 in Washington).

<sup>b</sup> 1 = less than high school, 2 = high school degree or some college, 3 = Bachelor's degree or higher

<sup>c</sup> 1 = never, 2 = rarely, 3 = 1-2 times a month, 4 = about once a week or more often

<sup>d</sup> 1 = very good, 2 = good, 3 = average, 4 = poor, 5 = very poor
