# Supplementary material for: Alcohol-Tolerant Workplace Environments Are a Risk Factor for Young Adult Alcohol Misuse on and off the Job in Australia and the United States
Source: MDPI journal article supplement (doi:10.3390/ijerph20186725), 2023-09-07
Supplement: s1 [file s1]

## SUPPLEMENTAL TABLES S3 TO S9: DETAILED REGRESSION RESULTS FOR ALCOHOL USE/IMPAIRMENT AT WORK

Tables S3a-c. Estimates from logistic regression of alcohol use or impairment at work in the past year on alcohol availability at work and covariates

| Table S3a. Model 1                              | Victoria     |              |               |          |              |              |              |              | Washington   |              |               |          |              |              |              |              |
|-------------------------------------------------|--------------|--------------|---------------|----------|--------------|--------------|--------------|--------------|--------------|--------------|---------------|----------|--------------|--------------|--------------|--------------|
|                                                 | B            | S.E.         | Wald          | df       | Sig.         | Exp(B)       | 95% C.I. for |              | B            | S.E.         | Wald          | df       | Sig.         | Exp(B)       | 95% C.I. for |              |
|                                                 |              |              |               |          |              |              | Lower        | Upper        |              |              |               |          |              |              | Lower        | Upper        |
| <b>Alcohol available in the workplace (0/1)</b> | <b>1.733</b> | <b>0.174</b> | <b>98.765</b> | <b>1</b> | <b>0.000</b> | <b>5.659</b> | <b>4.021</b> | <b>7.965</b> | <b>1.223</b> | <b>0.200</b> | <b>37.313</b> | <b>1</b> | <b>0.000</b> | <b>3.399</b> | <b>2.295</b> | <b>5.033</b> |
| Adolescent alcohol use (1-8)                    | 0.342        | 0.059        | 33.467        | 1        | 0.000        | 1.408        | 1.254        | 1.581        | 0.120        | 0.075        | 2.573         | 1        | 0.109        | 1.128        | 0.974        | 1.306        |
| Male (0/1)                                      | 0.756        | 0.176        | 18.384        | 1        | 0.000        | 2.131        | 1.508        | 3.011        | 0.133        | 0.162        | 0.668         | 1        | 0.414        | 1.142        | 0.831        | 1.569        |
| White (0/1)                                     | -0.092       | 0.294        | 0.098         | 1        | 0.754        | 0.912        | 0.513        | 1.622        | -0.015       | 0.193        | 0.006         | 1        | 0.939        | 0.985        | 0.675        | 1.438        |
| 4-year college graduate (0/1)                   | 0.405        | 0.189        | 4.600         | 1        | 0.032        | 1.499        | 1.036        | 2.171        | 0.129        | 0.188        | 0.470         | 1        | 0.493        | 1.137        | 0.787        | 1.644        |
| Currently full-time student (0/1)               | -0.085       | 0.279        | 0.093         | 1        | 0.760        | 0.918        | 0.532        | 1.586        | 0.069        | 0.262        | 0.070         | 1        | 0.792        | 1.072        | 0.641        | 1.791        |
| Married (0/1)                                   | -0.634       | 0.361        | 3.084         | 1        | 0.079        | 0.531        | 0.262        | 1.076        | -0.728       | 0.216        | 11.404        | 1        | 0.001        | 0.483        | 0.316        | 0.737        |
| Has child or children (0/1)                     | -0.564       | 0.290        | 3.782         | 1        | 0.052        | 0.569        | 0.322        | 1.004        | -0.464       | 0.211        | 4.843         | 1        | 0.028        | 0.629        | 0.416        | 0.950        |
| Financial problems (0/1)                        | -0.159       | 0.208        | 0.584         | 1        | 0.445        | 0.853        | 0.567        | 1.283        | 0.049        | 0.176        | 0.078         | 1        | 0.781        | 1.050        | 0.744        | 1.483        |
| Months of full-time employment (1-12)           | 0.002        | 0.019        | 0.013         | 1        | 0.910        | 1.002        | 0.965        | 1.040        | 0.020        | 0.018        | 1.214         | 1        | 0.271        | 1.021        | 0.984        | 1.058        |
| High-risk industry (0/1)                        | 0.182        | 0.181        | 1.011         | 1        | 0.315        | 1.200        | 0.841        | 1.713        | 0.402        | 0.169        | 5.682         | 1        | 0.017        | 1.494        | 1.074        | 2.079        |
| Constant                                        | -1.776       | 0.398        | 19.870        | 1        | 0.000        | 0.169        |              |              | -0.967       | 0.324        | 8.928         | 1        | 0.003        | 0.380        |              |              |

  

| Table S3b. Model 2                                   | Victoria     |              |               |          |              |              |              |               | Washington   |              |               |          |              |              |              |               |
|------------------------------------------------------|--------------|--------------|---------------|----------|--------------|--------------|--------------|---------------|--------------|--------------|---------------|----------|--------------|--------------|--------------|---------------|
|                                                      | B            | S.E.         | Wald          | df       | Sig.         | Exp(B)       | 95% C.I. for |               | B            | S.E.         | Wald          | df       | Sig.         | Exp(B)       | 95% C.I. for |               |
|                                                      |              |              |               |          |              |              | Lower        | Upper         |              |              |               |          |              |              | Lower        | Upper         |
| <b>Alcohol available in the workplace</b>            | <b>1.863</b> | <b>0.190</b> | <b>95.959</b> | <b>1</b> | <b>0.000</b> | <b>6.445</b> | <b>4.439</b> | <b>9.357</b>  | <b>1.122</b> | <b>0.214</b> | <b>27.423</b> | <b>1</b> | <b>0.000</b> | <b>3.071</b> | <b>2.018</b> | <b>4.674</b>  |
| <b>High-risk drinking Age 25 (0,1,2)<sup>a</sup></b> | <b>2.043</b> | <b>0.232</b> | <b>77.796</b> | <b>1</b> | <b>0.000</b> | <b>7.715</b> | <b>4.899</b> | <b>12.147</b> | <b>2.092</b> | <b>0.263</b> | <b>63.028</b> | <b>1</b> | <b>0.000</b> | <b>8.100</b> | <b>4.833</b> | <b>13.576</b> |
| Adolescent alcohol use (1-8)                         | 0.301        | 0.063        | 23.139        | 1        | 0.000        | 1.351        | 1.195        | 1.528         | 0.050        | 0.083        | 0.354         | 1        | 0.552        | 1.051        | 0.893        | 1.237         |
| Male (0/1)                                           | 0.436        | 0.193        | 5.112         | 1        | 0.024        | 1.546        | 1.060        | 2.257         | -0.030       | 0.175        | 0.029         | 1        | 0.865        | 0.971        | 0.688        | 1.369         |
| White (0/1)                                          | 0.004        | 0.329        | 0.000         | 1        | 0.989        | 1.004        | 0.527        | 1.915         | -0.021       | 0.208        | 0.010         | 1        | 0.920        | 0.979        | 0.651        | 1.472         |
| 4-year college graduate (0/1)                        | 0.333        | 0.203        | 2.690         | 1        | 0.101        | 1.396        | 0.937        | 2.079         | 0.215        | 0.200        | 1.150         | 1        | 0.284        | 1.240        | 0.837        | 1.835         |
| Currently full-time student (0/1)                    | 0.091        | 0.303        | 0.090         | 1        | 0.764        | 1.095        | 0.605        | 1.981         | 0.158        | 0.280        | 0.319         | 1        | 0.572        | 1.171        | 0.677        | 2.026         |
| Married (0/1)                                        | -0.262       | 0.364        | 0.519         | 1        | 0.471        | 0.769        | 0.377        | 1.570         | -0.671       | 0.228        | 8.649         | 1        | 0.003        | 0.511        | 0.327        | 0.799         |
| Has child or children (0/1)                          | -0.322       | 0.308        | 1.091         | 1        | 0.296        | 0.725        | 0.396        | 1.326         | -0.287       | 0.225        | 1.629         | 1        | 0.202        | 0.751        | 0.483        | 1.166         |
| Financial problems (0/1)                             | -0.308       | 0.236        | 1.706         | 1        | 0.192        | 0.735        | 0.463        | 1.167         | -0.011       | 0.191        | 0.003         | 1        | 0.954        | 0.989        | 0.681        | 1.437         |
| Months of full-time employment (1-12)                | 0.003        | 0.021        | 0.029         | 1        | 0.866        | 1.003        | 0.964        | 1.045         | 0.031        | 0.020        | 2.377         | 1        | 0.123        | 1.031        | 0.992        | 1.073         |
| High-risk industry (0/1)                             | 0.183        | 0.197        | 0.860         | 1        | 0.354        | 1.201        | 0.816        | 1.768         | 0.390        | 0.181        | 4.671         | 1        | 0.031        | 1.477        | 1.037        | 2.105         |
| Constant                                             | -2.222       | 0.442        | 25.226        | 1        | 0.000        | 0.108        |              |               | -1.242       | 0.353        | 12.358        | 1        | 0.000        | 0.289        |              |               |

*Note:* <sup>a</sup> 1 = low risk, 2 = risky, 3 = hazardous or harmful

| Table S3c. Model 3                             | Pooled Sample |              |                |          |              |              |              |              | State x Alcohol Availability Interaction |              |              |          |              |              |              |              |
|------------------------------------------------|---------------|--------------|----------------|----------|--------------|--------------|--------------|--------------|------------------------------------------|--------------|--------------|----------|--------------|--------------|--------------|--------------|
|                                                | B             | S.E.         | Wald           | df       | Sig.         | Exp(B)       | 95% C.I. for |              | B                                        | S.E.         | Wald         | df       | Sig.         | Exp(B)       | 95% C.I. for |              |
|                                                |               |              |                |          |              |              | Lower        | Upper        |                                          |              |              |          |              |              | Lower        | Upper        |
| State (1=VIC, 0=WA)                            | -0.299        | 0.144        | 4.323          | 1        | 0.038        | 0.741        | 0.559        | 0.983        |                                          |              |              |          |              |              |              |              |
| <b>Alcohol available in the workplace</b>      | <b>1.531</b>  | <b>0.139</b> | <b>120.675</b> | <b>1</b> | <b>0.000</b> | <b>4.623</b> | <b>3.518</b> | <b>6.075</b> | <b>0.758</b>                             | <b>0.279</b> | <b>7.354</b> | <b>1</b> | <b>0.007</b> | <b>2.133</b> | <b>1.234</b> | <b>3.689</b> |
| High-risk drinking Age 25 (0,1,2) <sup>a</sup> | 2.029         | 0.171        | 140.315        | 1        | 0.000        | 7.607        | 5.437        | 10.641       |                                          |              |              |          |              |              |              |              |
| Adolescent alcohol use (1-8)                   | 0.208         | 0.048        | 19.071         | 1        | 0.000        | 1.231        | 1.121        | 1.351        |                                          |              |              |          |              |              |              |              |
| Male (0/1)                                     | 0.202         | 0.128        | 2.505          | 1        | 0.113        | 1.224        | 0.953        | 1.572        |                                          |              |              |          |              |              |              |              |
| White (0/1)                                    | -0.009        | 0.174        | 0.003          | 1        | 0.957        | 0.991        | 0.705        | 1.393        |                                          |              |              |          |              |              |              |              |
| 4-year college graduate (0/1)                  | 0.261         | 0.140        | 3.457          | 1        | 0.063        | 1.298        | 0.986        | 1.709        |                                          |              |              |          |              |              |              |              |
| Currently full-time student (0/1)              | 0.127         | 0.203        | 0.393          | 1        | 0.531        | 1.135        | 0.763        | 1.689        |                                          |              |              |          |              |              |              |              |
| Married (0/1)                                  | -0.576        | 0.193        | 8.912          | 1        | 0.003        | 0.562        | 0.385        | 0.821        |                                          |              |              |          |              |              |              |              |
| Has child or children (0/1)                    | -0.317        | 0.179        | 3.125          | 1        | 0.077        | 0.728        | 0.513        | 1.035        |                                          |              |              |          |              |              |              |              |
| Financial problems (0/1)                       | -0.114        | 0.147        | 0.602          | 1        | 0.438        | 0.892        | 0.669        | 1.190        |                                          |              |              |          |              |              |              |              |
| Months of full-time employment (1-12)          | 0.018         | 0.014        | 1.734          | 1        | 0.188        | 1.019        | 0.991        | 1.047        |                                          |              |              |          |              |              |              |              |
| High-risk industry (0/1)                       | 0.287         | 0.131        | 4.803          | 1        | 0.028        | 1.332        | 1.031        | 1.721        |                                          |              |              |          |              |              |              |              |
| Constant                                       | -1.561        | 0.260        | 36.001         | 1        | 0.000        | 0.210        |              |              |                                          |              |              |          |              |              |              |              |

*Note* : <sup>a</sup> 1 = low risk, 2 = risky, 3 = hazardous or harmful

Tables S4a-c. Estimates from logistic regression of alcohol use or impairment at work in the past year on workplace alcohol policy and covariates

| Table S4a. Model 1                     | Victoria |       |        |    |       |        |             |       | Washington |       |        |    |       |        |             |       |
|----------------------------------------|----------|-------|--------|----|-------|--------|-------------|-------|------------|-------|--------|----|-------|--------|-------------|-------|
|                                        | B        | S.E.  | Wald   | df | Sig.  | Exp(B) | 95% C.I.for |       | B          | S.E.  | Wald   | df | Sig.  | Exp(B) | 95% C.I.for |       |
|                                        |          |       |        |    |       |        | Lower       | Upper |            |       |        |    |       |        | Lower       | Upper |
| Workplace has a written alcohol policy |          |       |        |    |       |        |             |       |            |       |        |    |       |        |             |       |
| Yes (reference)                        |          |       | 12.169 | 2  | 0.002 |        |             |       |            |       | 2.696  | 2  | 0.260 |        |             |       |
| No                                     | 0.829    | 0.243 | 11.666 | 1  | 0.001 | 2.291  | 1.424       | 3.688 | 0.392      | 0.247 | 2.522  | 1  | 0.112 | 1.480  | 0.912       | 2.401 |
| Don't know                             | 0.031    | 0.180 | 0.030  | 1  | 0.863 | 1.031  | 0.725       | 1.468 | 0.144      | 0.203 | 0.500  | 1  | 0.479 | 1.155  | 0.775       | 1.721 |
| Adolescent alcohol use (1-8)           | 0.324    | 0.056 | 34.032 | 1  | 0.000 | 1.383  | 1.240       | 1.542 | 0.168      | 0.072 | 5.427  | 1  | 0.020 | 1.183  | 1.027       | 1.363 |
| Male (0/1)                             | 0.734    | 0.164 | 19.922 | 1  | 0.000 | 2.084  | 1.509       | 2.876 | 0.108      | 0.158 | 0.467  | 1  | 0.494 | 1.114  | 0.817       | 1.520 |
| White (0/1)                            | 0.099    | 0.277 | 0.127  | 1  | 0.722 | 1.104  | 0.641       | 1.902 | 0.064      | 0.189 | 0.115  | 1  | 0.735 | 1.066  | 0.736       | 1.544 |
| 4-year college graduate (0/1)          | 0.548    | 0.176 | 9.647  | 1  | 0.002 | 1.729  | 1.224       | 2.444 | 0.239      | 0.182 | 1.724  | 1  | 0.189 | 1.271  | 0.889       | 1.816 |
| Currently full-time student (0/1)      | -0.173   | 0.260 | 0.442  | 1  | 0.506 | 0.841  | 0.505       | 1.401 | -0.012     | 0.255 | 0.002  | 1  | 0.962 | 0.988  | 0.599       | 1.629 |
| Married (0/1)                          | -0.413   | 0.334 | 1.526  | 1  | 0.217 | 0.662  | 0.344       | 1.274 | -0.679     | 0.209 | 10.563 | 1  | 0.001 | 0.507  | 0.337       | 0.764 |
| Has child or children (0/1)            | -0.734   | 0.275 | 7.111  | 1  | 0.008 | 0.480  | 0.280       | 0.823 | -0.493     | 0.207 | 5.679  | 1  | 0.017 | 0.611  | 0.407       | 0.916 |
| Financial problems (0/1)               | -0.226   | 0.194 | 1.352  | 1  | 0.245 | 0.798  | 0.545       | 1.167 | -0.074     | 0.171 | 0.188  | 1  | 0.664 | 0.929  | 0.664       | 1.298 |
| Months of full-time employment (1-12)  | 0.013    | 0.018 | 0.508  | 1  | 0.476 | 1.013  | 0.978       | 1.049 | 0.020      | 0.018 | 1.229  | 1  | 0.268 | 1.020  | 0.985       | 1.057 |
| High-risk industry (0/1)               | 0.111    | 0.171 | 0.425  | 1  | 0.515 | 1.118  | 0.800       | 1.562 | 0.535      | 0.163 | 10.778 | 1  | 0.001 | 1.707  | 1.241       | 2.350 |
| Constant                               | -1.350   | 0.383 | 12.461 | 1  | 0.000 | 0.259  |             |       | -0.937     | 0.321 | 8.505  | 1  | 0.004 | 0.392  |             |       |

| Table S4b. Model 2                             | Victoria |       |        |    |       |        |             |        | Washington |       |        |    |       |        |             |        |
|------------------------------------------------|----------|-------|--------|----|-------|--------|-------------|--------|------------|-------|--------|----|-------|--------|-------------|--------|
|                                                | B        | S.E.  | Wald   | df | Sig.  | Exp(B) | 95% C.I.for |        | B          | S.E.  | Wald   | df | Sig.  | Exp(B) | 95% C.I.for |        |
|                                                |          |       |        |    |       |        | Lower       | Upper  |            |       |        |    |       |        | Lower       | Upper  |
| Workplace has a written alcohol policy         |          |       |        |    |       |        |             |        |            |       |        |    |       |        |             |        |
| Yes (reference)                                |          |       | 11.680 | 2  | 0.003 |        |             |        |            |       | 2.009  | 2  | 0.366 |        |             |        |
| No                                             | 0.860    | 0.258 | 11.081 | 1  | 0.001 | 2.364  | 1.425       | 3.924  | 0.323      | 0.267 | 1.469  | 1  | 0.226 | 1.382  | 0.819       | 2.331  |
| Don't know                                     | 0.020    | 0.196 | 0.010  | 1  | 0.919 | 1.020  | 0.695       | 1.497  | -0.115     | 0.227 | 0.258  | 1  | 0.611 | 0.891  | 0.571       | 1.390  |
| High-risk drinking Age 25 (0,1,2) <sup>a</sup> | 1.931    | 0.219 | 77.887 | 1  | 0.000 | 6.900  | 4.493       | 10.596 | 2.173      | 0.263 | 68     | 1  | 0.000 | 8.785  | 5.247       | 14.708 |
| Adolescent alcohol use (1-8)                   | 0.284    | 0.057 | 24.527 | 1  | 0.000 | 1.328  | 1.187       | 1.486  | 0.089      | 0.081 | 1.212  | 1  | 0.271 | 1.093  | 0.933       | 1.281  |
| Male (0/1)                                     | 0.415    | 0.178 | 5.435  | 1  | 0.020 | 1.515  | 1.068       | 2.148  | -0.066     | 0.173 | 0.148  | 1  | 0.701 | 0.936  | 0.667       | 1.312  |
| White (0/1)                                    | 0.241    | 0.302 | 0.637  | 1  | 0.425 | 1.273  | 0.704       | 2.301  | 0.089      | 0.204 | 0.190  | 1  | 0.663 | 1.093  | 0.733       | 1.628  |
| 4-year college graduate (0/1)                  | 0.518    | 0.188 | 7.591  | 1  | 0.006 | 1.678  | 1.161       | 2.426  | 0.346      | 0.196 | 3.124  | 1  | 0.077 | 1.414  | 0.963       | 2.076  |
| Currently full-time student (0/1)              | -0.049   | 0.281 | 0.031  | 1  | 0.861 | 0.952  | 0.548       | 1.652  | 0.058      | 0.273 | 0.045  | 1  | 0.832 | 1.060  | 0.621       | 1.808  |
| Married (0/1)                                  | -0.034   | 0.339 | 0.010  | 1  | 0.920 | 0.966  | 0.497       | 1.878  | -0.622     | 0.223 | 7.750  | 1  | 0.005 | 0.537  | 0.347       | 0.832  |
| Has child or children (0/1)                    | -0.496   | 0.291 | 2.914  | 1  | 0.088 | 0.609  | 0.344       | 1.076  | -0.304     | 0.221 | 1.885  | 1  | 0.170 | 0.738  | 0.478       | 1.139  |
| Financial problems (0/1)                       | -0.373   | 0.215 | 3.007  | 1  | 0.083 | 0.689  | 0.452       | 1.050  | -0.094     | 0.186 | 0.258  | 1  | 0.612 | 0.910  | 0.632       | 1.310  |
| Months of full-time employment (1-12)          | 0.015    | 0.019 | 0.607  | 1  | 0.436 | 1.015  | 0.978       | 1.054  | 0.030      | 0.020 | 2.358  | 1  | 0.125 | 1.031  | 0.992       | 1.071  |
| High-risk industry (0/1)                       | 0.118    | 0.184 | 0.412  | 1  | 0.521 | 1.125  | 0.785       | 1.614  | 0.494      | 0.176 | 7.884  | 1  | 0.005 | 1.639  | 1.161       | 2.313  |
| Constant                                       | -1.772   | 0.419 | 17.887 | 1  | 0.000 | 0.170  |             |        | -1.203     | 0.353 | 11.625 | 1  | 0.001 | 0.300  |             |        |

Note: <sup>a</sup> 1 = low risk, 2 = risky, 3 = hazardous or harmful

**Table S4c. Model 3**

|                                                | Pooled Sample |              |               |          |              |              |                             | State x Alcohol Policy Interaction |              |              |          |              |              |                             |
|------------------------------------------------|---------------|--------------|---------------|----------|--------------|--------------|-----------------------------|------------------------------------|--------------|--------------|----------|--------------|--------------|-----------------------------|
|                                                | B             | S.E.         | Wald          | df       | Sig.         | Exp(B)       | 95% C.I. for<br>Lower Upper | B                                  | S.E.         | Wald         | df       | Sig.         | Exp(B)       | 95% C.I. for<br>Lower Upper |
| State (1=VIC, 0=WA)                            | -0.017        | 0.135        | 0.0157        | 1        | 0.900        | 0.983        | 0.755 1.280                 |                                    |              |              |          |              |              |                             |
| <b>Workplace has a written alcohol policy</b>  |               |              |               |          |              |              |                             |                                    |              |              |          |              |              |                             |
| <b>Yes</b> (reference)                         |               |              | 11.311        | 2        | 0.003        |              |                             |                                    |              | 1.569        | 2        | 0.456        |              |                             |
| <b>No</b>                                      | <b>0.584</b>  | <b>0.182</b> | <b>10.316</b> | <b>1</b> | <b>0.001</b> | <b>1.794</b> | <b>1.256 2.562</b>          | <b>0.458</b>                       | <b>0.366</b> | <b>1.567</b> | <b>1</b> | <b>0.211</b> | <b>1.581</b> | <b>0.772 3.238</b>          |
| <b>Don't know</b>                              | <b>-0.039</b> | <b>0.146</b> | <b>0.071</b>  | <b>1</b> | <b>0.790</b> | <b>0.962</b> | <b>0.722 1.281</b>          | <b>0.090</b>                       | <b>0.291</b> | <b>0.096</b> | <b>1</b> | <b>0.757</b> | <b>1.095</b> | <b>0.618 1.938</b>          |
| High-risk drinking Age 25 (0,1,2) <sup>a</sup> | 2.028         | 0.167        | 147.611       | 1        | 0.000        | 7.598        | 5.478 10.539                |                                    |              |              |          |              |              |                             |
| Adolescent alcohol use (1-8)                   | 0.219         | 0.045        | 23.618        | 1        | 0.000        | 1.245        | 1.139 1.359                 |                                    |              |              |          |              |              |                             |
| Male (0/1)                                     | 0.167         | 0.122        | 1.864         | 1        | 0.172        | 1.182        | 0.930 1.501                 |                                    |              |              |          |              |              |                             |
| White (0/1)                                    | 0.148         | 0.167        | 0.788         | 1        | 0.375        | 1.160        | 0.836 1.608                 |                                    |              |              |          |              |              |                             |
| 4-year college graduate (0/1)                  | 0.422         | 0.133        | 10.024        | 1        | 0.002        | 1.525        | 1.174 1.980                 |                                    |              |              |          |              |              |                             |
| Currently full-time student (0/1)              | -0.005        | 0.193        | 0.001         | 1        | 0.978        | 0.995        | 0.681 1.452                 |                                    |              |              |          |              |              |                             |
| Married (0/1)                                  | -0.459        | 0.185        | 6.194         | 1        | 0.013        | 0.632        | 0.440 0.907                 |                                    |              |              |          |              |              |                             |
| Has child or children (0/1)                    | -0.390        | 0.173        | 5.090         | 1        | 0.024        | 0.677        | 0.482 0.950                 |                                    |              |              |          |              |              |                             |
| Financial problems (0/1)                       | -0.206        | 0.140        | 2.177         | 1        | 0.140        | 0.813        | 0.618 1.070                 |                                    |              |              |          |              |              |                             |
| Months of full-time employment (1-12)          | 0.023         | 0.013        | 2.952         | 1        | 0.086        | 1.023        | 0.997 1.051                 |                                    |              |              |          |              |              |                             |
| High-risk industry (0/1)                       | 0.324         | 0.125        | 6.669         | 1        | 0.010        | 1.382        | 1.081 1.767                 |                                    |              |              |          |              |              |                             |
| Constant                                       | -1.476        | 0.255        | 33.606        | 1        | 0.000        | 0.229        |                             |                                    |              |              |          |              |              |                             |

*Note:* <sup>a</sup> 1 = low risk, 2 = risky, 3 = hazardous or harmful

Tables S5a-c. Estimates from logistic regression of alcohol use or impairment at work in the past year on workplace alcohol policy that bans alcohol and covariates

| Table S5a. Model 1                     |  | Victoria |       |        |    |       |        |             | Washington |        |       |        |    |       |        |             |       |  |
|----------------------------------------|--|----------|-------|--------|----|-------|--------|-------------|------------|--------|-------|--------|----|-------|--------|-------------|-------|--|
|                                        |  | B        | S.E.  | Wald   | df | Sig.  | Exp(B) | 95% C.I.for |            | B      | S.E.  | Wald   | df | Sig.  | Exp(B) | 95% C.I.for |       |  |
|                                        |  |          |       |        |    |       |        | Lower       | Upper      |        |       |        |    |       |        | Lower       | Upper |  |
| Alcohol policy completely bans alcohol |  |          |       |        |    |       |        |             |            |        |       |        |    |       |        |             |       |  |
| Yes (reference)                        |  |          |       | 31.330 | 3  | 0.000 |        |             |            |        |       | 29.664 | 3  | 0.000 |        |             |       |  |
| No                                     |  | 0.958    | 0.219 | 19.200 | 1  | 0.000 | 2.606  | 1.698       | 3.999      | 1.252  | 0.242 | 26.834 | 1  | 0.000 | 3.497  | 2.178       | 5.617 |  |
| Don't know                             |  | 0.456    | 0.205 | 4.939  | 1  | 0.026 | 1.578  | 1.055       | 2.359      | 0.421  | 0.211 | 3.962  | 1  | 0.047 | 1.523  | 1.006       | 2.306 |  |
| No policy                              |  | 1.247    | 0.262 | 22.642 | 1  | 0.000 | 3.480  | 2.082       | 5.816      | 0.677  | 0.254 | 7.138  | 1  | 0.008 | 1.969  | 1.198       | 3.236 |  |
| Adolescent alcohol use (1-8)           |  | 0.350    | 0.057 | 37.329 | 1  | 0.000 | 1.419  | 1.268       | 1.587      | 0.170  | 0.074 | 5.273  | 1  | 0.022 | 1.185  | 1.025       | 1.370 |  |
| Male (0/1)                             |  | 0.740    | 0.167 | 19.705 | 1  | 0.000 | 2.096  | 1.512       | 2.906      | 0.119  | 0.162 | 0.541  | 1  | 0.462 | 1.127  | 0.820       | 1.548 |  |
| White (0/1)                            |  | 0.052    | 0.283 | 0.034  | 1  | 0.854 | 1.054  | 0.605       | 1.833      | 0.024  | 0.193 | 0.016  | 1  | 0.901 | 1.024  | 0.702       | 1.494 |  |
| 4-year college graduate (0/1)          |  | 0.503    | 0.179 | 7.878  | 1  | 0.005 | 1.654  | 1.164       | 2.352      | 0.219  | 0.186 | 1.384  | 1  | 0.239 | 1.244  | 0.864       | 1.792 |  |
| Currently full-time student (0/1)      |  | -0.139   | 0.264 | 0.277  | 1  | 0.598 | 0.870  | 0.519       | 1.460      | 0.060  | 0.259 | 0.053  | 1  | 0.817 | 1.062  | 0.639       | 1.763 |  |
| Married (0/1)                          |  | -0.414   | 0.337 | 1.502  | 1  | 0.220 | 0.661  | 0.341       | 1.281      | -0.721 | 0.214 | 11.341 | 1  | 0.001 | 0.486  | 0.320       | 0.740 |  |
| Has child or children (0/1)            |  | -0.786   | 0.279 | 7.956  | 1  | 0.005 | 0.456  | 0.264       | 0.787      | -0.515 | 0.211 | 5.953  | 1  | 0.015 | 0.598  | 0.395       | 0.904 |  |
| Financial problems (0/1)               |  | -0.182   | 0.197 | 0.859  | 1  | 0.354 | 0.833  | 0.566       | 1.226      | -0.017 | 0.175 | 0.009  | 1  | 0.923 | 0.983  | 0.698       | 1.385 |  |
| Months of full-time employment (1-12)  |  | 0.020    | 0.018 | 1.188  | 1  | 0.276 | 1.020  | 0.984       | 1.057      | 0.026  | 0.019 | 1.990  | 1  | 0.158 | 1.027  | 0.990       | 1.065 |  |
| High-risk industry (0/1)               |  | 0.094    | 0.173 | 0.295  | 1  | 0.587 | 1.099  | 0.782       | 1.543      | 0.429  | 0.168 | 6.562  | 1  | 0.010 | 1.536  | 1.106       | 2.133 |  |
| Constant                               |  | -1.830   | 0.407 | 20.259 | 1  | 0.000 | 0.160  |             |            | -1.204 | 0.334 | 12.962 | 1  | 0.000 | 0.300  |             |       |  |

| Table S5b. Model 2                             |  | Victoria |       |        |    |       |        |             | Washington |        |       |        |    |       |        |             |        |  |
|------------------------------------------------|--|----------|-------|--------|----|-------|--------|-------------|------------|--------|-------|--------|----|-------|--------|-------------|--------|--|
|                                                |  | B        | S.E.  | Wald   | df | Sig.  | Exp(B) | 95% C.I.for |            | B      | S.E.  | Wald   | df | Sig.  | Exp(B) | 95% C.I.for |        |  |
|                                                |  |          |       |        |    |       |        | Lower       | Upper      |        |       |        |    |       |        | Lower       | Upper  |  |
| Alcohol policy completely bans alcohol         |  |          |       |        |    |       |        |             |            |        |       |        |    |       |        |             |        |  |
| Yes (reference)                                |  |          |       | 31.845 | 3  | 0.000 |        |             |            |        |       | 25.797 | 3  | 0.000 |        |             |        |  |
| No                                             |  | 1.067    | 0.236 | 20.498 | 1  | 0.000 | 2.907  | 1.832       | 4.614      | 1.236  | 0.253 | 23.823 | 1  | 0.000 | 3.441  | 2.095       | 5.652  |  |
| Don't know                                     |  | 0.501    | 0.225 | 4.960  | 1  | 0.026 | 1.651  | 1.062       | 2.565      | 0.159  | 0.235 | 0.458  | 1  | 0.498 | 1.172  | 0.740       | 1.858  |  |
| No policy                                      |  | 1.335    | 0.282 | 22.481 | 1  | 0.000 | 3.800  | 2.188       | 6.598      | 0.605  | 0.274 | 4.875  | 1  | 0.027 | 1.831  | 1.070       | 3.132  |  |
| High-risk drinking Age 25 (0,1,2) <sup>a</sup> |  | 1.974    | 0.223 | 78.571 | 1  | 0.000 | 7.199  | 4.653       | 11.139     | 2.150  | 0.265 | 65.972 | 1  | 0.000 | 8.583  | 5.109       | 14.418 |  |
| Adolescent alcohol use (1-8)                   |  | 0.311    | 0.059 | 27.511 | 1  | 0.000 | 1.365  | 1.215       | 1.534      | 0.091  | 0.083 | 1.200  | 1  | 0.273 | 1.095  | 0.931       | 1.288  |  |
| Male (0/1)                                     |  | 0.411    | 0.182 | 5.125  | 1  | 0.024 | 1.508  | 1.057       | 2.153      | -0.047 | 0.176 | 0.070  | 1  | 0.791 | 0.954  | 0.676       | 1.348  |  |
| White (0/1)                                    |  | 0.184    | 0.308 | 0.354  | 1  | 0.552 | 1.201  | 0.656       | 2.199      | 0.050  | 0.206 | 0.060  | 1  | 0.807 | 1.052  | 0.702       | 1.576  |  |
| 4-year college graduate (0/1)                  |  | 0.458    | 0.192 | 5.703  | 1  | 0.017 | 1.581  | 1.086       | 2.302      | 0.326  | 0.199 | 2.670  | 1  | 0.102 | 1.385  | 0.937       | 2.047  |  |
| Currently full-time student (0/1)              |  | -0.024   | 0.285 | 0.007  | 1  | 0.933 | 0.976  | 0.558       | 1.708      | 0.151  | 0.277 | 0.299  | 1  | 0.585 | 1.163  | 0.676       | 2.001  |  |
| Married (0/1)                                  |  | -0.023   | 0.342 | 0.005  | 1  | 0.946 | 0.977  | 0.500       | 1.910      | -0.655 | 0.229 | 8.148  | 1  | 0.004 | 0.520  | 0.331       | 0.814  |  |
| Has child or children (0/1)                    |  | -0.574   | 0.295 | 3.800  | 1  | 0.051 | 0.563  | 0.316       | 1.003      | -0.325 | 0.226 | 2.073  | 1  | 0.150 | 0.723  | 0.464       | 1.125  |  |
| Financial problems (0/1)                       |  | -0.318   | 0.218 | 2.120  | 1  | 0.145 | 0.728  | 0.475       | 1.116      | -0.035 | 0.190 | 0.034  | 1  | 0.854 | 0.966  | 0.665       | 1.402  |  |
| Months of full-time employment (1-12)          |  | 0.022    | 0.019 | 1.321  | 1  | 0.250 | 1.023  | 0.984       | 1.062      | 0.037  | 0.020 | 3.393  | 1  | 0.065 | 1.038  | 0.998       | 1.080  |  |
| High-risk industry (0/1)                       |  | 0.095    | 0.187 | 0.257  | 1  | 0.612 | 1.099  | 0.762       | 1.585      | 0.379  | 0.181 | 4.388  | 1  | 0.036 | 1.460  | 1.025       | 2.081  |  |
| Constant                                       |  | -2.296   | 0.445 | 26.584 | 1  | 0.000 | 0.101  |             |            | -1.477 | 0.366 | 16.284 | 1  | 0.000 | 0.228  |             |        |  |

Note: <sup>a</sup> 1 = low risk, 2 = risky, 3 = hazardous or harmful

**Table S5c. Model 3**

|                                                | Pooled Sample |              |               |          |              |              |                             | State x Alcohol Policy Interaction |              |              |          |              |              |                             |
|------------------------------------------------|---------------|--------------|---------------|----------|--------------|--------------|-----------------------------|------------------------------------|--------------|--------------|----------|--------------|--------------|-----------------------------|
|                                                | B             | S.E.         | Wald          | df       | Sig.         | Exp(B)       | 95% C.I. for<br>Lower Upper | B                                  | S.E.         | Wald         | df       | Sig.         | Exp(B)       | 95% C.I. for<br>Lower Upper |
| State (1=VIC, 0=WA)                            | -0.167        | 0.139        | 1.445         | 1        | 0.229        | 0.846        | 0.645 1.111                 |                                    |              |              |          |              |              |                             |
| <b>Alcohol policy completely bans alcohol</b>  |               |              |               |          |              |              |                             |                                    |              |              |          |              |              |                             |
| <b>Yes</b> (reference)                         |               |              | 53.312        | 3        | 0.000        |              |                             |                                    |              | 4.523        | 3        | 0.210        |              |                             |
| <b>No</b>                                      | <b>1.098</b>  | <b>0.169</b> | <b>42.176</b> | <b>1</b> | <b>0.000</b> | <b>2.999</b> | <b>2.153 4.178</b>          | <b>0.642</b>                       | <b>0.386</b> | <b>2.767</b> | <b>1</b> | <b>0.096</b> | <b>1.899</b> | <b>0.892 4.045</b>          |
| <b>Don't know</b>                              | <b>0.345</b>  | <b>0.159</b> | <b>4.724</b>  | <b>1</b> | <b>0.030</b> | <b>1.412</b> | <b>1.034 1.926</b>          | <b>0.274</b>                       | <b>0.316</b> | <b>0.749</b> | <b>1</b> | <b>0.387</b> | <b>1.315</b> | <b>0.707 2.444</b>          |
| <b>No policy</b>                               | <b>0.954</b>  | <b>0.191</b> | <b>24.860</b> | <b>1</b> | <b>0.000</b> | <b>2.597</b> | <b>1.784 3.778</b>          | <b>-0.203</b>                      | <b>0.339</b> | <b>0.358</b> | <b>1</b> | <b>0.550</b> | <b>0.816</b> | <b>0.420 1.587</b>          |
| High-risk drinking Age 25 (0,1,2) <sup>a</sup> | 2.034         | 0.169        | 145.281       | 1        | 0.000        | 7.641        | 5.490 10.635                |                                    |              |              |          |              |              |                             |
| Adolescent alcohol use (1-8)                   | 0.236         | 0.046        | 26.128        | 1        | 0.000        | 1.266        | 1.157 1.386                 |                                    |              |              |          |              |              |                             |
| Male (0/1)                                     | 0.182         | 0.124        | 2.128         | 1        | 0.145        | 1.199        | 0.940 1.530                 |                                    |              |              |          |              |              |                             |
| White (0/1)                                    | 0.103         | 0.170        | 0.367         | 1        | 0.545        | 1.108        | 0.795 1.545                 |                                    |              |              |          |              |              |                             |
| 4-year college graduate (0/1)                  | 0.368         | 0.136        | 7.338         | 1        | 0.007        | 1.445        | 1.107 1.885                 |                                    |              |              |          |              |              |                             |
| Currently full-time student (0/1)              | 0.054         | 0.196        | 0.076         | 1        | 0.783        | 1.055        | 0.719 1.550                 |                                    |              |              |          |              |              |                             |
| Married (0/1)                                  | -0.471        | 0.188        | 6.266         | 1        | 0.012        | 0.624        | 0.432 0.903                 |                                    |              |              |          |              |              |                             |
| Has child or children (0/1)                    | -0.436        | 0.176        | 6.141         | 1        | 0.013        | 0.647        | 0.458 0.913                 |                                    |              |              |          |              |              |                             |
| Financial problems (0/1)                       | -0.154        | 0.142        | 1.174         | 1        | 0.279        | 0.857        | 0.648 1.133                 |                                    |              |              |          |              |              |                             |
| Months of full-time employment (1-12)          | 0.031         | 0.014        | 5.091         | 1        | 0.024        | 1.031        | 1.004 1.059                 |                                    |              |              |          |              |              |                             |
| High-risk industry (0/1)                       | 0.255         | 0.128        | 3.985         | 1        | 0.046        | 1.291        | 1.005 1.658                 |                                    |              |              |          |              |              |                             |
| Constant                                       | -1.794        | 0.265        | 45.814        | 1        | 0.000        | 0.166        |                             |                                    |              |              |          |              |              |                             |

*Note:* <sup>a</sup> 1 = low risk, 2 = risky, 3 = hazardous or harmful

Tables S6a-c. Estimates from logistic regression of alcohol use or impairment at work in the past year on alcohol-using co-workers and covariates

| Table S6a. Model 1                                    | Victoria     |              |               |          |              |              |              |              | Washington   |              |               |          |              |              |              |              |
|-------------------------------------------------------|--------------|--------------|---------------|----------|--------------|--------------|--------------|--------------|--------------|--------------|---------------|----------|--------------|--------------|--------------|--------------|
|                                                       | B            | S.E.         | Wald          | df       | Sig.         | Exp(B)       | 95% C.I. for |              | B            | S.E.         | Wald          | df       | Sig.         | Exp(B)       | 95% C.I. for |              |
|                                                       |              |              |               |          |              |              | Lower        | Upper        |              |              |               |          |              |              | Lower        | Upper        |
| <b>Co-workers drink at work or come to work drunk</b> | <b>1.499</b> | <b>0.192</b> | <b>61.089</b> | <b>1</b> | <b>0.000</b> | <b>4.477</b> | <b>3.074</b> | <b>6.520</b> | <b>1.274</b> | <b>0.186</b> | <b>47.089</b> | <b>1</b> | <b>0.000</b> | <b>3.576</b> | <b>2.485</b> | <b>5.145</b> |
| Adolescent alcohol use (1-8)                          | 0.317        | 0.057        | 31.215        | 1        | 0.000        | 1.373        | 1.228        | 1.534        | 0.119        | 0.075        | 2.512         | 1        | 0.113        | 1.126        | 0.972        | 1.304        |
| Male (0/1)                                            | 0.738        | 0.171        | 18.591        | 1        | 0.000        | 2.091        | 1.495        | 2.924        | 0.090        | 0.164        | 0.304         | 1        | 0.581        | 1.094        | 0.794        | 1.508        |
| White (0/1)                                           | 0.143        | 0.287        | 0.249         | 1        | 0.618        | 1.154        | 0.657        | 2.027        | 0.006        | 0.194        | 0.001         | 1        | 0.976        | 1.006        | 0.687        | 1.472        |
| 4-year college graduate (0/1)                         | 0.396        | 0.183        | 4.681         | 1        | 0.030        | 1.486        | 1.038        | 2.128        | 0.178        | 0.189        | 0.892         | 1        | 0.345        | 1.195        | 0.825        | 1.731        |
| Currently full-time student (0/1)                     | -0.163       | 0.271        | 0.365         | 1        | 0.546        | 0.849        | 0.500        | 1.443        | 0.001        | 0.265        | 0.000         | 1        | 0.997        | 1.001        | 0.595        | 1.684        |
| Married (0/1)                                         | -0.480       | 0.348        | 1.900         | 1        | 0.168        | 0.619        | 0.313        | 1.224        | -0.695       | 0.216        | 10.307        | 1        | 0.001        | 0.499        | 0.327        | 0.763        |
| Has child or children (0/1)                           | -0.718       | 0.285        | 6.368         | 1        | 0.012        | 0.488        | 0.279        | 0.852        | -0.436       | 0.213        | 4.194         | 1        | 0.041        | 0.647        | 0.426        | 0.981        |
| Financial problems (0/1)                              | -0.286       | 0.202        | 2.000         | 1        | 0.157        | 0.751        | 0.505        | 1.117        | -0.027       | 0.177        | 0.024         | 1        | 0.878        | 0.973        | 0.688        | 1.376        |
| Months of full-time employment (1-12)                 | 0.005        | 0.018        | 0.062         | 1        | 0.804        | 1.005        | 0.969        | 1.042        | 0.025        | 0.019        | 1.767         | 1        | 0.184        | 1.025        | 0.988        | 1.064        |
| High-risk industry (0/1)                              | 0.057        | 0.177        | 0.105         | 1        | 0.746        | 1.059        | 0.749        | 1.497        | 0.429        | 0.169        | 6.451         | 1        | 0.011        | 1.535        | 1.103        | 2.137        |
| Constant                                              | -1.499       | 0.385        | 15.158        | 1        | 0.000        | 0.223        |              |              | -1.070       | 0.327        | 10.720        | 1        | 0.001        | 0.343        |              |              |

| Table S6b. Model 2                                    | Victoria     |              |               |          |              |              |              |              | Washington   |              |               |          |              |              |              |               |
|-------------------------------------------------------|--------------|--------------|---------------|----------|--------------|--------------|--------------|--------------|--------------|--------------|---------------|----------|--------------|--------------|--------------|---------------|
|                                                       | B            | S.E.         | Wald          | df       | Sig.         | Exp(B)       | 95% C.I. for |              | B            | S.E.         | Wald          | df       | Sig.         | Exp(B)       | 95% C.I. for |               |
|                                                       |              |              |               |          |              |              | Lower        | Upper        |              |              |               |          |              |              | Lower        | Upper         |
| <b>Co-workers drink at work or come to work drunk</b> | <b>1.394</b> | <b>0.202</b> | <b>47.601</b> | <b>1</b> | <b>0.000</b> | <b>4.032</b> | <b>2.713</b> | <b>5.991</b> | <b>1.179</b> | <b>0.199</b> | <b>35.082</b> | <b>1</b> | <b>0.000</b> | <b>3.251</b> | <b>2.201</b> | <b>4.803</b>  |
| <b>High-risk drinking Age 25 (0,1,2)<sup>a</sup></b>  | <b>1.842</b> | <b>0.221</b> | <b>69.238</b> | <b>1</b> | <b>0.000</b> | <b>6.311</b> | <b>4.089</b> | <b>9.741</b> | <b>2.105</b> | <b>0.267</b> | <b>62.320</b> | <b>1</b> | <b>0.000</b> | <b>8.205</b> | <b>4.865</b> | <b>13.835</b> |
| Adolescent alcohol use (1-8)                          | 0.269        | 0.059        | 21.069        | 1        | 0.000        | 1.309        | 1.167        | 1.468        | 0.055        | 0.083        | 0.444         | 1        | 0.505        | 1.057        | 0.898        | 1.244         |
| Male (0/1)                                            | 0.451        | 0.184        | 6.008         | 1        | 0.014        | 1.569        | 1.095        | 2.250        | -0.063       | 0.177        | 0.127         | 1        | 0.721        | 0.939        | 0.664        | 1.327         |
| White (0/1)                                           | 0.251        | 0.314        | 0.637         | 1        | 0.425        | 1.285        | 0.695        | 2.377        | 0.021        | 0.208        | 0.011         | 1        | 0.918        | 1.022        | 0.679        | 1.537         |
| 4-year college graduate (0/1)                         | 0.335        | 0.194        | 2.968         | 1        | 0.085        | 1.398        | 0.955        | 2.046        | 0.268        | 0.201        | 1.769         | 1        | 0.183        | 1.307        | 0.881        | 1.938         |
| Currently full-time student (0/1)                     | -0.028       | 0.288        | 0.010         | 1        | 0.921        | 0.972        | 0.552        | 1.710        | 0.111        | 0.283        | 0.154         | 1        | 0.694        | 1.117        | 0.642        | 1.944         |
| Married (0/1)                                         | -0.124       | 0.349        | 0.126         | 1        | 0.723        | 0.884        | 0.446        | 1.752        | -0.648       | 0.229        | 7.991         | 1        | 0.005        | 0.523        | 0.334        | 0.820         |
| Has child or children (0/1)                           | -0.471       | 0.296        | 2.526         | 1        | 0.112        | 0.625        | 0.350        | 1.116        | -0.254       | 0.226        | 1.262         | 1        | 0.261        | 0.775        | 0.498        | 1.209         |
| Financial problems (0/1)                              | -0.428       | 0.223        | 3.698         | 1        | 0.054        | 0.652        | 0.421        | 1.008        | -0.064       | 0.192        | 0.112         | 1        | 0.738        | 0.938        | 0.644        | 1.365         |
| Months of full-time employment (1-12)                 | 0.010        | 0.020        | 0.259         | 1        | 0.611        | 1.010        | 0.972        | 1.049        | 0.038        | 0.020        | 3.406         | 1        | 0.065        | 1.038        | 0.998        | 1.080         |
| High-risk industry (0/1)                              | 0.037        | 0.189        | 0.038         | 1        | 0.846        | 1.037        | 0.716        | 1.503        | 0.401        | 0.181        | 4.921         | 1        | 0.027        | 1.494        | 1.048        | 2.129         |
| Constant                                              | -1.830       | 0.418        | 19.193        | 1        | 0.000        | 0.160        |              |              | -1.395       | 0.359        | 15.069        | 1        | 0.000        | 0.248        |              |               |

*Note:* <sup>a</sup> 1 = low risk, 2 = risky, 3 = hazardous or harmful

**Table S6c. Model 3**

|                                                       | Pooled Sample |              |               |          |              |              |              |              |
|-------------------------------------------------------|---------------|--------------|---------------|----------|--------------|--------------|--------------|--------------|
|                                                       | B             | S.E.         | Wald          | df       | Sig.         | Exp(B)       | 95% C.I. for |              |
|                                                       |               |              |               |          |              |              | Lower        | Upper        |
| State (1=VIC, 0=WA)                                   | 0.016         | 0.138        | 0.014         | 1        | 0.907        | 1.016        | 0.776        | 1.331        |
| <b>Co-workers drink at work or come to work drunk</b> | <b>1.261</b>  | <b>0.140</b> | <b>81.297</b> | <b>1</b> | <b>0.000</b> | <b>3.527</b> | <b>2.682</b> | <b>4.639</b> |
| High-risk drinking Age 25 (0,1,2) <sup>a</sup>        | 1.951         | 0.169        | 132.855       | 1        | 0.000        | 7.037        | 5.050        | 9.806        |
| Adolescent alcohol use (1-8)                          | 0.201         | 0.046        | 18.738        | 1        | 0.000        | 1.222        | 1.116        | 1.338        |
| Male (0/1)                                            | 0.182         | 0.126        | 2.088         | 1        | 0.149        | 1.199        | 0.937        | 1.534        |
| White (0/1)                                           | 0.108         | 0.172        | 0.397         | 1        | 0.529        | 1.114        | 0.796        | 1.560        |
| 4-year college graduate (0/1)                         | 0.300         | 0.138        | 4.734         | 1        | 0.030        | 1.350        | 1.030        | 1.768        |
| Currently full-time student (0/1)                     | 0.033         | 0.199        | 0.028         | 1        | 0.868        | 1.034        | 0.700        | 1.527        |
| Married (0/1)                                         | -0.501        | 0.190        | 6.966         | 1        | 0.008        | 0.606        | 0.418        | 0.879        |
| Has child or children (0/1)                           | -0.349        | 0.177        | 3.886         | 1        | 0.049        | 0.705        | 0.499        | 0.998        |
| Financial problems (0/1)                              | -0.208        | 0.144        | 2.083         | 1        | 0.149        | 0.812        | 0.612        | 1.077        |
| Months of full-time employment (1-12)                 | 0.024         | 0.014        | 3.137         | 1        | 0.077        | 1.025        | 0.997        | 1.053        |
| High-risk industry (0/1)                              | 0.239         | 0.129        | 3.438         | 1        | 0.064        | 1.270        | 0.986        | 1.635        |
| Constant                                              | -1.621        | 0.258        | 39.488        | 1        | 0.000        | 0.198        |              |              |

*Note:* <sup>a</sup> 1 = low risk, 2 = risky, 3 = hazardous or harmful

| State x Co-workers Drink Interaction |              |              |          |              |              |              |              |
|--------------------------------------|--------------|--------------|----------|--------------|--------------|--------------|--------------|
| B                                    | S.E.         | Wald         | df       | Sig.         | Exp(B)       | 95% C.I. for |              |
|                                      |              |              |          |              |              | Lower        | Upper        |
| <b>0.205</b>                         | <b>0.279</b> | <b>0.541</b> | <b>1</b> | <b>0.462</b> | <b>1.228</b> | <b>0.710</b> | <b>2.123</b> |



Tables S7a-c. Estimates from logistic regression of alcohol use or impairment at work in the past year on workplace alcohol use attitudes and covariates

| Table S7a. Model 1                                | Victoria     |              |               |          |              |              |              |              | Washington   |              |               |          |              |              |              |               |
|---------------------------------------------------|--------------|--------------|---------------|----------|--------------|--------------|--------------|--------------|--------------|--------------|---------------|----------|--------------|--------------|--------------|---------------|
|                                                   | B            | S.E.         | Wald          | df       | Sig.         | Exp(B)       | 95% C.I. for |              | B            | S.E.         | Wald          | df       | Sig.         | Exp(B)       | 95% C.I. for |               |
|                                                   |              |              |               |          |              |              | Lower        | Upper        |              |              |               |          |              |              | Lower        | Upper         |
| <b>Workplace attitude toward drinking at work</b> |              |              |               |          |              |              |              |              |              |              |               |          |              |              |              |               |
| <b>Not acceptable</b> (reference)                 |              |              | 44.320        | 2        | 0.000        |              |              |              |              |              | 39.164        | 2        | 0.000        |              |              |               |
| <b>Discouraged</b>                                | <b>0.966</b> | <b>0.243</b> | <b>15.818</b> | <b>1</b> | <b>0.000</b> | <b>2.627</b> | <b>1.632</b> | <b>4.228</b> | <b>1.115</b> | <b>0.254</b> | <b>19.242</b> | <b>1</b> | <b>0.000</b> | <b>3.050</b> | <b>1.853</b> | <b>5.020</b>  |
| <b>Tolerated or encouraged</b>                    | <b>1.709</b> | <b>0.296</b> | <b>33.420</b> | <b>1</b> | <b>0.000</b> | <b>5.521</b> | <b>3.093</b> | <b>9.853</b> | <b>1.741</b> | <b>0.359</b> | <b>23.515</b> | <b>1</b> | <b>0.000</b> | <b>5.705</b> | <b>2.822</b> | <b>11.531</b> |
| Adolescent alcohol use (1-8)                      | 0.310        | 0.056        | 31.128        | 1        | 0.000        | 1.364        | 1.223        | 1.521        | 0.116        | 0.075        | 2.367         | 1        | 0.124        | 1.123        | 0.969        | 1.302         |
| Male (0/1)                                        | 0.720        | 0.169        | 18.191        | 1        | 0.000        | 2.054        | 1.476        | 2.859        | 0.068        | 0.163        | 0.174         | 1        | 0.677        | 1.070        | 0.778        | 1.473         |
| White (0/1)                                       | 0.212        | 0.285        | 0.550         | 1        | 0.458        | 1.236        | 0.706        | 2.162        | 0.048        | 0.194        | 0.060         | 1        | 0.806        | 1.049        | 0.718        | 1.533         |
| 4-year college graduate (0/1)                     | 0.496        | 0.181        | 7.542         | 1        | 0.006        | 1.643        | 1.153        | 2.341        | 0.158        | 0.188        | 0.704         | 1        | 0.401        | 1.171        | 0.810        | 1.695         |
| Currently full-time student (0/1)                 | -0.092       | 0.266        | 0.119         | 1        | 0.730        | 0.912        | 0.541        | 1.537        | -0.103       | 0.267        | 0.149         | 1        | 0.700        | 0.902        | 0.535        | 1.523         |
| Married (0/1)                                     | -0.388       | 0.339        | 1.307         | 1        | 0.253        | 0.679        | 0.349        | 1.319        | -0.645       | 0.214        | 9.105         | 1        | 0.003        | 0.524        | 0.345        | 0.798         |
| Has child or children (0/1)                       | -0.655       | 0.278        | 5.548         | 1        | 0.019        | 0.520        | 0.301        | 0.896        | -0.440       | 0.212        | 4.315         | 1        | 0.038        | 0.644        | 0.426        | 0.975         |
| Financial problems (0/1)                          | -0.302       | 0.201        | 2.267         | 1        | 0.132        | 0.739        | 0.499        | 1.095        | -0.050       | 0.176        | 0.079         | 1        | 0.778        | 0.952        | 0.673        | 1.345         |
| Months of full-time employment (1-12)             | 0.007        | 0.018        | 0.141         | 1        | 0.707        | 1.007        | 0.972        | 1.043        | 0.019        | 0.019        | 1.074         | 1        | 0.300        | 1.019        | 0.983        | 1.057         |
| High-risk industry (0/1)                          | 0.035        | 0.176        | 0.041         | 1        | 0.840        | 1.036        | 0.734        | 1.462        | 0.452        | 0.168        | 7.254         | 1        | 0.007        | 1.572        | 1.131        | 2.184         |
| Constant                                          | -1.507       | 0.383        | 15.498        | 1        | 0.000        | 0.222        |              |              | -0.940       | 0.324        | 8.408         | 1        | 0.004        | 0.391        |              |               |

| Table S7b. Model 2                                   | Victoria     |              |               |          |              |              |              |              | Washington   |              |               |          |              |              |              |               |
|------------------------------------------------------|--------------|--------------|---------------|----------|--------------|--------------|--------------|--------------|--------------|--------------|---------------|----------|--------------|--------------|--------------|---------------|
|                                                      | B            | S.E.         | Wald          | df       | Sig.         | Exp(B)       | 95% C.I. for |              | B            | S.E.         | Wald          | df       | Sig.         | Exp(B)       | 95% C.I. for |               |
|                                                      |              |              |               |          |              |              | Lower        | Upper        |              |              |               |          |              |              | Lower        | Upper         |
| <b>Workplace attitude toward drinking at work</b>    |              |              |               |          |              |              |              |              |              |              |               |          |              |              |              |               |
| <b>Not acceptable</b> (reference)                    |              |              | 32.382        | 2        | 0.000        |              |              |              |              |              | 29.777        | 2        | 0.000        |              |              |               |
| <b>Discouraged</b>                                   | <b>0.975</b> | <b>0.256</b> | <b>14.517</b> | <b>1</b> | <b>0.000</b> | <b>2.652</b> | <b>1.606</b> | <b>4.380</b> | <b>1.070</b> | <b>0.271</b> | <b>15.554</b> | <b>1</b> | <b>0.000</b> | <b>2.915</b> | <b>1.713</b> | <b>4.960</b>  |
| <b>Tolerated or encouraged</b>                       | <b>1.455</b> | <b>0.313</b> | <b>21.657</b> | <b>1</b> | <b>0.000</b> | <b>4.284</b> | <b>2.321</b> | <b>7.907</b> | <b>1.562</b> | <b>0.380</b> | <b>16.925</b> | <b>1</b> | <b>0.000</b> | <b>4.767</b> | <b>2.265</b> | <b>10.033</b> |
| <b>High-risk drinking Age 25 (0,1,2)<sup>a</sup></b> | <b>1.855</b> | <b>0.222</b> | <b>69.933</b> | <b>1</b> | <b>0.000</b> | <b>6.394</b> | <b>4.139</b> | <b>9.876</b> | <b>2.086</b> | <b>0.264</b> | <b>62.389</b> | <b>1</b> | <b>0.000</b> | <b>8.056</b> | <b>4.801</b> | <b>13.521</b> |
| Adolescent alcohol use (1-8)                         | 0.265        | 0.057        | 21.335        | 1        | 0.000        | 1.304        | 1.165        | 1.460        | 0.049        | 0.084        | 0.348         | 1        | 0.555        | 1.051        | 0.892        | 1.238         |
| Male (0/1)                                           | 0.438        | 0.181        | 5.852         | 1        | 0.016        | 1.550        | 1.087        | 2.210        | -0.091       | 0.176        | 0.265         | 1        | 0.607        | 0.913        | 0.647        | 1.290         |
| White (0/1)                                          | 0.277        | 0.312        | 0.788         | 1        | 0.375        | 1.319        | 0.716        | 2.428        | 0.039        | 0.208        | 0.035         | 1        | 0.851        | 1.040        | 0.691        | 1.565         |
| 4-year college graduate (0/1)                        | 0.448        | 0.191        | 5.517         | 1        | 0.019        | 1.566        | 1.077        | 2.276        | 0.278        | 0.200        | 1.919         | 1        | 0.166        | 1.320        | 0.891        | 1.955         |
| Currently full-time student (0/1)                    | 0.021        | 0.284        | 0.006         | 1        | 0.940        | 1.022        | 0.585        | 1.784        | -0.018       | 0.282        | 0.004         | 1        | 0.950        | 0.982        | 0.565        | 1.708         |
| Married (0/1)                                        | -0.039       | 0.342        | 0.013         | 1        | 0.909        | 0.962        | 0.492        | 1.879        | -0.581       | 0.227        | 6.529         | 1        | 0.011        | 0.559        | 0.358        | 0.873         |
| Has child or children (0/1)                          | -0.440       | 0.289        | 2.315         | 1        | 0.128        | 0.644        | 0.365        | 1.135        | -0.266       | 0.225        | 1.398         | 1        | 0.237        | 0.766        | 0.493        | 1.191         |
| Financial problems (0/1)                             | -0.410       | 0.219        | 3.494         | 1        | 0.062        | 0.664        | 0.432        | 1.020        | -0.086       | 0.191        | 0.203         | 1        | 0.652        | 0.917        | 0.630        | 1.335         |
| Months of full-time employment (1-12)                | 0.011        | 0.019        | 0.310         | 1        | 0.578        | 1.011        | 0.973        | 1.050        | 0.032        | 0.020        | 2.569         | 1        | 0.109        | 1.033        | 0.993        | 1.074         |
| High-risk industry (0/1)                             | 0.049        | 0.188        | 0.068         | 1        | 0.794        | 1.050        | 0.727        | 1.517        | 0.438        | 0.180        | 5.911         | 1        | 0.015        | 1.550        | 1.089        | 2.207         |
| Constant                                             | -1.820       | 0.415        | 19.259        | 1        | 0.000        | 0.162        |              |              | -1.265       | 0.355        | 12.674        | 1        | 0.000        | 0.282        |              |               |

*Note:* <sup>a</sup> 1 = low risk, 2 = risky, 3 = hazardous or harmful

**Table S7c. Model 3**

|                                                   | Pooled Sample |              |               |          |              |              |              |              |
|---------------------------------------------------|---------------|--------------|---------------|----------|--------------|--------------|--------------|--------------|
|                                                   | B             | S.E.         | Wald          | df       | Sig.         | Exp(B)       | 95% C.I. for |              |
|                                                   |               |              |               |          |              |              | Lower        | Upper        |
| State (1=VIC, 0=WA)                               | -0.018        | 0.150        | 0.014         | 1        | 0.906        | 0.982        | 0.732        | 1.319        |
| <b>Workplace attitude toward drinking at work</b> |               |              |               |          |              |              |              |              |
| <b>Not acceptable</b> (reference)                 |               |              | 29.223        | 2        | 0.000        |              |              |              |
| <b>Discouraged</b>                                | <b>1.043</b>  | <b>0.268</b> | <b>15.191</b> | <b>1</b> | <b>0.000</b> | <b>2.838</b> | <b>1.680</b> | <b>4.796</b> |
| <b>Tolerated or encouraged</b>                    | <b>1.535</b>  | <b>0.377</b> | <b>16.625</b> | <b>1</b> | <b>0.000</b> | <b>4.644</b> | <b>2.220</b> | <b>9.714</b> |
| High-risk drinking Age 25 (0,1,2) <sup>a</sup>    | 1.955         | 0.169        | 134.399       | 1        | 0.000        | 7.063        | 5.076        | 9.830        |
| Adolescent alcohol use (1-8)                      | 0.199         | 0.046        | 19.010        | 1        | 0.000        | 1.221        | 1.116        | 1.335        |
| Male (0/1)                                        | 0.167         | 0.125        | 1.799         | 1        | 0.180        | 1.182        | 0.926        | 1.509        |
| White (0/1)                                       | 0.129         | 0.171        | 0.565         | 1        | 0.452        | 1.137        | 0.813        | 1.591        |
| 4-year college graduate (0/1)                     | 0.365         | 0.136        | 7.168         | 1        | 0.007        | 1.440        | 1.103        | 1.881        |
| Currently full-time student (0/1)                 | -0.008        | 0.197        | 0.002         | 1        | 0.968        | 0.992        | 0.674        | 1.461        |
| Married (0/1)                                     | -0.428        | 0.187        | 5.230         | 1        | 0.022        | 0.652        | 0.452        | 0.941        |
| Has child or children (0/1)                       | -0.347        | 0.175        | 3.932         | 1        | 0.047        | 0.707        | 0.501        | 0.996        |
| Financial problems (0/1)                          | -0.215        | 0.143        | 2.262         | 1        | 0.133        | 0.806        | 0.609        | 1.068        |
| Months of full-time employment (1-12)             | 0.021         | 0.014        | 2.267         | 1        | 0.132        | 1.021        | 0.994        | 1.048        |
| High-risk industry (0/1)                          | 0.262         | 0.128        | 4.177         | 1        | 0.041        | 1.300        | 1.011        | 1.671        |
| Constant                                          | -1.527        | 0.257        | 35.458        | 1        | 0.000        | 0.217        |              |              |

*Note:* <sup>a</sup> 1 = low risk, 2 = risky, 3 = hazardous or harmful

| State by Workplace Attitude Interaction |              |              |          |              |              |              |              |  |
|-----------------------------------------|--------------|--------------|----------|--------------|--------------|--------------|--------------|--|
| B                                       | S.E.         | Wald         | df       | Sig.         | Exp(B)       | 95% C.I. for |              |  |
|                                         |              |              |          |              |              | Lower        | Upper        |  |
|                                         |              |              |          |              |              |              |              |  |
|                                         |              |              | 0.138    | 2            | 0.933        |              |              |  |
| <b>-0.087</b>                           | <b>0.367</b> | <b>0.056</b> | <b>1</b> | <b>0.813</b> | <b>0.917</b> | <b>0.446</b> | <b>1.884</b> |  |
| <b>-0.151</b>                           | <b>0.486</b> | <b>0.096</b> | <b>1</b> | <b>0.757</b> | <b>0.860</b> | <b>0.332</b> | <b>2.232</b> |  |

Tables S8a-b. Estimates from logistic regression of alcohol use or impairment at work in the past year on ALL workplace alcohol environment variables

| Table S8a                                      | Victoria |       |        |    |       |        |              |        | Washington |       |        |    |       |        |              |        |
|------------------------------------------------|----------|-------|--------|----|-------|--------|--------------|--------|------------|-------|--------|----|-------|--------|--------------|--------|
|                                                | B        | S.E.  | Wald   | df | Sig.  | Exp(B) | 95% C.I. for |        | B          | S.E.  | Wald   | df | Sig.  | Exp(B) | 95% C.I. for |        |
|                                                |          |       |        |    |       |        | Lower        | Upper  |            |       |        |    |       |        | Lower        | Upper  |
| Alcohol available in the workplace             | 1.619    | 0.202 | 64.125 | 1  | 0.000 | 5.049  | 3.397        | 7.505  | 0.701      | 0.239 | 8.622  | 1  | 0.003 | 2.015  | 1.262        | 3.217  |
| Workplace has alcohol policy                   |          |       |        |    |       |        |              |        |            |       |        |    |       |        |              |        |
| yes                                            |          |       | 6.507  | 2  | 0.039 |        |              |        |            |       | 2.069  | 2  | 0.355 |        |              |        |
| no                                             | 0.670    | 0.292 | 5.278  | 1  | 0.022 | 1.954  | 1.103        | 3.461  | -0.162     | 0.307 | 0.278  | 1  | 0.598 | 0.851  | 0.466        | 1.552  |
| don't know                                     | -0.108   | 0.218 | 0.244  | 1  | 0.621 | 0.898  | 0.585        | 1.377  | -0.348     | 0.246 | 2.005  | 1  | 0.157 | 0.706  | 0.436        | 1.143  |
| Workplace attitude toward drinking at work     |          |       |        |    |       |        |              |        |            |       |        |    |       |        |              |        |
| Not acceptable (reference)                     |          |       | 2.245  | 2  | 0.325 |        |              |        |            |       | 8.978  | 2  | 0.011 |        |              |        |
| Discouraged                                    | 0.163    | 0.290 | 0.314  | 1  | 0.576 | 1.176  | 0.666        | 2.078  | 0.709      | 0.302 | 5.536  | 1  | 0.019 | 2.033  | 1.126        | 3.671  |
| Tolerated or encouraged                        | 0.522    | 0.354 | 2.172  | 1  | 0.141 | 1.685  | 0.842        | 3.371  | 0.946      | 0.419 | 5.109  | 1  | 0.024 | 2.576  | 1.134        | 5.850  |
| Co-workers drink at work or come to work drunk | 0.894    | 0.230 | 15.132 | 1  | 0.000 | 2.444  | 1.558        | 3.835  | 0.811      | 0.219 | 13.700 | 1  | 0.000 | 2.250  | 1.465        | 3.458  |
| High-risk drinking Age 25 (0,1,2) <sup>a</sup> | 2.080    | 0.247 | 70.805 | 1  | 0.000 | 8.005  | 4.931        | 12.995 | 2.519      | 0.302 | 69.623 | 1  | 0.000 | 12.416 | 6.871        | 22.435 |
| Adolescent alcohol use (1-8)                   | 0.321    | 0.065 | 24.195 | 1  | 0.000 | 1.378  | 1.213        | 1.566  | 0.006      | 0.086 | 0.005  | 1  | 0.945 | 1.006  | 0.850        | 1.191  |
| Male (0/1)                                     | 0.418    | 0.199 | 4.416  | 1  | 0.036 | 1.518  | 1.029        | 2.242  | -0.098     | 0.182 | 0.292  | 1  | 0.589 | 0.907  | 0.635        | 1.294  |
| White (0/1)                                    | 0.081    | 0.334 | 0.058  | 1  | 0.809 | 1.084  | 0.563        | 2.088  | -0.035     | 0.216 | 0.026  | 1  | 0.873 | 0.966  | 0.633        | 1.475  |
| 4-year college graduate (0/1)                  | 0.304    | 0.212 | 2.064  | 1  | 0.151 | 1.356  | 0.895        | 2.054  | 0.184      | 0.209 | 0.772  | 1  | 0.380 | 1.202  | 0.797        | 1.812  |
| Currently full-time student (0/1)              | 0.085    | 0.311 | 0.075  | 1  | 0.785 | 1.089  | 0.592        | 2.002  | 0.097      | 0.293 | 0.111  | 1  | 0.740 | 1.102  | 0.621        | 1.957  |
| Married (0/1)                                  | -0.176   | 0.373 | 0.221  | 1  | 0.638 | 0.839  | 0.404        | 1.744  | -0.648     | 0.235 | 7.585  | 1  | 0.006 | 0.523  | 0.330        | 0.829  |
| Has child or children (0/1)                    | -0.408   | 0.317 | 1.657  | 1  | 0.198 | 0.665  | 0.358        | 1.237  | -0.224     | 0.231 | 0.946  | 1  | 0.331 | 0.799  | 0.509        | 1.256  |
| Financial problems (0/1)                       | -0.365   | 0.239 | 2.323  | 1  | 0.127 | 0.694  | 0.434        | 1.110  | -0.001     | 0.198 | 0.000  | 1  | 0.994 | 0.999  | 0.677        | 1.473  |
| Months of full-time employment (1-12)          | -0.004   | 0.021 | 0.044  | 1  | 0.834 | 0.996  | 0.955        | 1.038  | 0.035      | 0.021 | 2.818  | 1  | 0.093 | 1.036  | 0.994        | 1.080  |
| High-risk industry (0/1)                       | 0.019    | 0.207 | 0.008  | 1  | 0.927 | 1.019  | 0.679        | 1.529  | 0.295      | 0.187 | 2.494  | 1  | 0.114 | 1.343  | 0.931        | 1.936  |
| Constant                                       | -2.429   | 0.472 | 26.515 | 1  | 0.000 | 0.088  |              |        | -1.315     | 0.374 | 12.361 | 1  | 0.000 | 0.268  |              |        |

Note: <sup>a</sup> 1 = low risk, 2 = risky, 3 = hazardous or harmful

| Table S8b                                             | Pooled Sample |              |               |          |              |              |              |              | State Interactions <sup>a</sup> |              |              |          |              |              |              |              |
|-------------------------------------------------------|---------------|--------------|---------------|----------|--------------|--------------|--------------|--------------|---------------------------------|--------------|--------------|----------|--------------|--------------|--------------|--------------|
|                                                       | B             | S.E.         | Wald          | df       | Sig.         | Exp(B)       | 95% C.I. for |              | B                               | S.E.         | Wald         | df       | Sig.         | Exp(B)       | 95% C.I. for |              |
|                                                       |               |              |               |          |              |              | Lower        | Upper        |                                 |              |              |          |              |              | Lower        | Upper        |
| State (1=VIC, 0=WA)                                   | -0.267        | 0.149        | 3.204         | 1        | 0.073        | 0.766        | 0.572        | 1.026        |                                 |              |              |          |              |              |              |              |
| <b>Alcohol available in the workplace</b>             | <b>1.217</b>  | <b>0.150</b> | <b>66.193</b> | <b>1</b> | <b>0.000</b> | <b>3.375</b> | <b>2.518</b> | <b>4.525</b> | <b>0.911</b>                    | <b>0.291</b> | <b>9.837</b> | <b>1</b> | <b>0.002</b> | <b>2.488</b> | <b>1.407</b> | <b>4.396</b> |
| <b>Workplace has alcohol policy</b>                   |               |              |               |          |              |              |              |              |                                 |              |              |          |              |              |              |              |
| <b>yes</b>                                            |               |              | 3.189         | 2        | 0.203        |              |              |              |                                 |              | 3.246        | 2        | 0.197        |              |              |              |
| <b>no</b>                                             | <b>0.214</b>  | <b>0.204</b> | <b>1.105</b>  | <b>1</b> | <b>0.293</b> | <b>1.239</b> | <b>0.831</b> | <b>1.846</b> | <b>0.731</b>                    | <b>0.407</b> | <b>3.231</b> | <b>1</b> | <b>0.072</b> | <b>2.078</b> | <b>0.936</b> | <b>4.612</b> |
| <b>don't know</b>                                     | <b>-0.183</b> | <b>0.158</b> | <b>1.342</b>  | <b>1</b> | <b>0.247</b> | <b>0.832</b> | <b>0.610</b> | <b>1.135</b> | <b>0.151</b>                    | <b>0.314</b> | <b>0.232</b> | <b>1</b> | <b>0.630</b> | <b>1.163</b> | <b>0.629</b> | <b>2.151</b> |
| <b>Workplace attitude toward drinking at work</b>     |               |              |               |          |              |              |              |              |                                 |              |              |          |              |              |              |              |
| <b>Not acceptable (reference)</b>                     |               |              | 8.056         | 2        | 0.018        |              |              |              |                                 |              | 0.132        | 2        | 0.936        |              |              |              |
| <b>Discouraged</b>                                    | <b>0.411</b>  | <b>0.203</b> | <b>4.090</b>  | <b>1</b> | <b>0.043</b> | <b>1.508</b> | <b>1.013</b> | <b>2.247</b> | <b>-0.137</b>                   | <b>0.391</b> | <b>0.122</b> | <b>1</b> | <b>0.726</b> | <b>0.872</b> | <b>0.406</b> | <b>1.875</b> |
| <b>Tolerated or encouraged</b>                        | <b>0.620</b>  | <b>0.265</b> | <b>5.479</b>  | <b>1</b> | <b>0.019</b> | <b>1.858</b> | <b>1.106</b> | <b>3.123</b> | <b>0.033</b>                    | <b>0.515</b> | <b>0.004</b> | <b>1</b> | <b>0.949</b> | <b>1.033</b> | <b>0.377</b> | <b>2.837</b> |
| <b>Co-workers drink at work or come to work drunk</b> | <b>0.815</b>  | <b>0.155</b> | <b>27.481</b> | <b>1</b> | <b>0.000</b> | <b>2.259</b> | <b>1.665</b> | <b>3.063</b> | <b>0.159</b>                    | <b>0.294</b> | <b>0.291</b> | <b>1</b> | <b>0.590</b> | <b>1.172</b> | <b>0.658</b> | <b>2.086</b> |
| High-risk drinking Age 25 (0,1,2) <sup>b</sup>        | 2.221         | 0.187        | 141.729       | 1        | 0.000        | 9.219        | 6.395        | 13.289       |                                 |              |              |          |              |              |              |              |
| Adolescent alcohol use (1-8)                          | 0.198         | 0.049        | 16.451        | 1        | 0.000        | 1.219        | 1.108        | 1.342        |                                 |              |              |          |              |              |              |              |
| Male (0/1)                                            | 0.163         | 0.131        | 1.540         | 1        | 0.215        | 1.177        | 0.910        | 1.522        |                                 |              |              |          |              |              |              |              |
| White (0/1)                                           | 0.002         | 0.179        | 0.000         | 1        | 0.991        | 1.002        | 0.706        | 1.423        |                                 |              |              |          |              |              |              |              |
| 4-year college graduate (0/1)                         | 0.207         | 0.145        | 2.033         | 1        | 0.154        | 1.230        | 0.925        | 1.636        |                                 |              |              |          |              |              |              |              |
| Currently full-time student (0/1)                     | 0.121         | 0.208        | 0.340         | 1        | 0.560        | 1.129        | 0.751        | 1.698        |                                 |              |              |          |              |              |              |              |
| Married (0/1)                                         | -0.536        | 0.197        | 7.403         | 1        | 0.007        | 0.585        | 0.397        | 0.861        |                                 |              |              |          |              |              |              |              |
| Has child or children (0/1)                           | -0.309        | 0.183        | 2.864         | 1        | 0.091        | 0.734        | 0.513        | 1.050        |                                 |              |              |          |              |              |              |              |
| Financial problems (0/1)                              | -0.132        | 0.150        | 0.768         | 1        | 0.381        | 0.877        | 0.653        | 1.177        |                                 |              |              |          |              |              |              |              |
| Months of full-time employment (1-12)                 | 0.017         | 0.014        | 1.421         | 1        | 0.233        | 1.017        | 0.989        | 1.046        |                                 |              |              |          |              |              |              |              |
| High-risk industry (0/1)                              | 0.155         | 0.135        | 1.318         | 1        | 0.251        | 1.168        | 0.896        | 1.522        |                                 |              |              |          |              |              |              |              |
| Constant                                              | -1.661        | 0.273        | 36.907        | 1        | 0.000        | 0.190        |              |              |                                 |              |              |          |              |              |              |              |

**Note:** <sup>a</sup> Only one interaction between state and each of the workplace alcohol environment variables was included in the model at a time.

<sup>b</sup>1 = low risk, 2 = risky, 3 = hazardous or harmful

Tables S9a-b. Estimates from logistic regression of alcohol use or impairment at work in the past year on ALL workplace alcohol environment variables

| Table S9a                                             | Victoria      |              |               |          |              |              |              |              | Washington    |              |               |          |              |              |              |              |
|-------------------------------------------------------|---------------|--------------|---------------|----------|--------------|--------------|--------------|--------------|---------------|--------------|---------------|----------|--------------|--------------|--------------|--------------|
|                                                       | B             | S.E.         | Wald          | df       | Sig.         | Exp(B)       | 95% C.I. for |              | B             | S.E.         | Wald          | df       | Sig.         | Exp(B)       | 95% C.I. for |              |
|                                                       |               |              |               |          |              |              | Lower        | Upper        |               |              |               |          |              |              | Lower        | Upper        |
| <b>Alcohol available in the workplace</b>             | <b>1.574</b>  | <b>0.213</b> | <b>54.755</b> | <b>1</b> | <b>0.000</b> | <b>4.824</b> | <b>3.180</b> | <b>7.318</b> | <b>0.493</b>  | <b>0.250</b> | <b>3.905</b>  | <b>1</b> | <b>0.048</b> | <b>1.638</b> | <b>1.004</b> | <b>2.671</b> |
| <b>Alcohol policy completely bans alcohol</b>         |               |              |               |          |              |              |              |              |               |              |               |          |              |              |              |              |
| <b>Yes (reference)</b>                                |               |              | 7.001         | 3        | 0.072        |              |              |              |               |              | 15.338        | 3        | 0.002        |              |              |              |
| <b>No</b>                                             | <b>0.185</b>  | <b>0.273</b> | <b>0.458</b>  | <b>1</b> | <b>0.498</b> | <b>1.203</b> | <b>0.704</b> | <b>2.055</b> | <b>0.995</b>  | <b>0.272</b> | <b>13.335</b> | <b>1</b> | <b>0.000</b> | <b>2.704</b> | <b>1.585</b> | <b>4.612</b> |
| <b>Don't know</b>                                     | <b>-0.024</b> | <b>0.251</b> | <b>0.009</b>  | <b>1</b> | <b>0.923</b> | <b>0.976</b> | <b>0.597</b> | <b>1.595</b> | <b>-0.121</b> | <b>0.253</b> | <b>0.229</b>  | <b>1</b> | <b>0.632</b> | <b>0.886</b> | <b>0.539</b> | <b>1.455</b> |
| <b>No policy</b>                                      | <b>0.751</b>  | <b>0.315</b> | <b>5.694</b>  | <b>1</b> | <b>0.017</b> | <b>2.118</b> | <b>1.143</b> | <b>3.924</b> | <b>0.106</b>  | <b>0.314</b> | <b>0.115</b>  | <b>1</b> | <b>0.735</b> | <b>1.112</b> | <b>0.601</b> | <b>2.056</b> |
| <b>Workplace attitude toward drinking at work</b>     |               |              |               |          |              |              |              |              |               |              |               |          |              |              |              |              |
| <b>Not acceptable (reference)</b>                     |               |              | 2.018         | 2        | 0.365        |              |              |              |               |              | 8.271         | 2        | 0.016        |              |              |              |
| <b>Discouraged</b>                                    | <b>0.153</b>  | <b>0.291</b> | <b>0.277</b>  | <b>1</b> | <b>0.599</b> | <b>1.165</b> | <b>0.659</b> | <b>2.060</b> | <b>0.688</b>  | <b>0.306</b> | <b>5.067</b>  | <b>1</b> | <b>0.024</b> | <b>1.990</b> | <b>1.093</b> | <b>3.623</b> |
| <b>Tolerated or encouraged</b>                        | <b>0.498</b>  | <b>0.356</b> | <b>1.958</b>  | <b>1</b> | <b>0.162</b> | <b>1.645</b> | <b>0.819</b> | <b>3.305</b> | <b>0.923</b>  | <b>0.423</b> | <b>4.752</b>  | <b>1</b> | <b>0.029</b> | <b>2.516</b> | <b>1.098</b> | <b>5.766</b> |
| <b>Co-workers drink at work or come to work drunk</b> | <b>0.895</b>  | <b>0.230</b> | <b>15.166</b> | <b>1</b> | <b>0.000</b> | <b>2.448</b> | <b>1.560</b> | <b>3.842</b> | <b>0.853</b>  | <b>0.223</b> | <b>14.588</b> | <b>1</b> | <b>0.000</b> | <b>2.346</b> | <b>1.514</b> | <b>3.633</b> |
| High-risk drinking Age 25 (0,1,2) <sup>a</sup>        | 2.088         | 0.248        | 70.970        | 1        | 0.000        | 8.066        | 4.963        | 13.109       | 2.514         | 0.303        | 68.786        | 1        | 0.000        | 12.356       | 6.821        | 22.383       |
| Adolescent alcohol use (1-8)                          | 0.325         | 0.066        | 24.538        | 1        | 0.000        | 1.383        | 1.217        | 1.573        | 0.013         | 0.088        | 0.022         | 1        | 0.882        | 1.013        | 0.853        | 1.203        |
| Male (0/1)                                            | 0.416         | 0.199        | 4.370         | 1        | 0.037        | 1.516        | 1.026        | 2.238        | -0.085        | 0.184        | 0.211         | 1        | 0.646        | 0.919        | 0.641        | 1.318        |
| White (0/1)                                           | 0.069         | 0.335        | 0.043         | 1        | 0.836        | 1.072        | 0.556        | 2.066        | -0.044        | 0.217        | 0.041         | 1        | 0.840        | 0.957        | 0.625        | 1.465        |
| 4-year college graduate (0/1)                         | 0.295         | 0.212        | 1.930         | 1        | 0.165        | 1.343        | 0.886        | 2.037        | 0.182         | 0.212        | 0.736         | 1        | 0.391        | 1.199        | 0.792        | 1.815        |
| Currently full-time student (0/1)                     | 0.086         | 0.311        | 0.076         | 1        | 0.783        | 1.089        | 0.593        | 2.003        | 0.163         | 0.295        | 0.305         | 1        | 0.581        | 1.177        | 0.660        | 2.099        |
| Married (0/1)                                         | -0.166        | 0.373        | 0.197         | 1        | 0.657        | 0.847        | 0.408        | 1.761        | -0.656        | 0.241        | 7.432         | 1        | 0.006        | 0.519        | 0.324        | 0.832        |
| Has child or children (0/1)                           | -0.426        | 0.318        | 1.792         | 1        | 0.181        | 0.653        | 0.350        | 1.218        | -0.235        | 0.234        | 1.008         | 1        | 0.315        | 0.791        | 0.500        | 1.250        |
| Financial problems (0/1)                              | -0.357        | 0.240        | 2.219         | 1        | 0.136        | 0.700        | 0.437        | 1.119        | 0.029         | 0.200        | 0.022         | 1        | 0.883        | 1.030        | 0.696        | 1.523        |
| Months of full-time employment (1-12)                 | -0.003        | 0.021        | 0.017         | 1        | 0.896        | 0.997        | 0.956        | 1.040        | 0.041         | 0.021        | 3.742         | 1        | 0.053        | 1.042        | 0.999        | 1.086        |
| High-risk industry (0/1)                              | 0.013         | 0.207        | 0.004         | 1        | 0.950        | 1.013        | 0.675        | 1.520        | 0.211         | 0.191        | 1.220         | 1        | 0.269        | 1.234        | 0.850        | 1.794        |
| Constant                                              | -2.492        | 0.481        | 26.846        | 1        | 0.000        | 0.083        |              |              | -1.536        | 0.384        | 15.984        | 1        | 0.000        | 0.215        |              |              |

*Note:* <sup>a</sup> 1 = low risk, 2 = risky, 3 = hazardous or harmful

| Table S9b                                      | Pooled Sample |              |               |          |              |              |              |              | State Interactions <sup>a</sup> |              |              |          |              |              |              |              |
|------------------------------------------------|---------------|--------------|---------------|----------|--------------|--------------|--------------|--------------|---------------------------------|--------------|--------------|----------|--------------|--------------|--------------|--------------|
|                                                | B             | S.E.         | Wald          | df       | Sig.         | Exp(B)       | 95% C.I. for |              | B                               | S.E.         | Wald         | df       | Sig.         | Exp(B)       | 95% C.I. for |              |
|                                                |               |              |               |          |              |              | Lower        | Upper        |                                 |              |              |          |              |              | Lower        | Upper        |
| State (1=VIC, 0=WA)                            | -0.314        | 0.150        | 4.354         | 1        | 0.037        | 0.731        | 0.544        | 0.981        |                                 |              |              |          |              |              |              |              |
| Alcohol available in the workplace             | <b>1.097</b>  | <b>0.156</b> | <b>49.637</b> | <b>1</b> | <b>0.000</b> | <b>2.995</b> | <b>2.207</b> | <b>4.064</b> | <b>0.892</b>                    | <b>0.292</b> | <b>9.327</b> | <b>1</b> | <b>0.002</b> | <b>2.441</b> | <b>1.377</b> | <b>4.328</b> |
| Alcohol policy completely bans alcohol         |               |              |               |          |              |              |              |              |                                 |              |              |          |              |              |              |              |
| Yes (reference)                                |               |              | 11.830        | 3        | 0.008        |              |              |              |                                 |              | 6.161        | 3        | 0.104        |              |              |              |
| No                                             | <b>0.412</b>  | <b>0.214</b> | <b>3.719</b>  | <b>1</b> | <b>0.054</b> | <b>1.510</b> | <b>0.993</b> | <b>2.296</b> | <b>0.685</b>                    | <b>0.420</b> | <b>2.663</b> | <b>1</b> | <b>0.103</b> | <b>1.985</b> | <b>0.871</b> | <b>4.520</b> |
| Don't know                                     | <b>0.010</b>  | <b>0.171</b> | <b>0.004</b>  | <b>1</b> | <b>0.953</b> | <b>1.010</b> | <b>0.722</b> | <b>1.413</b> | <b>0.129</b>                    | <b>0.335</b> | <b>0.148</b> | <b>1</b> | <b>0.701</b> | <b>1.138</b> | <b>0.589</b> | <b>2.195</b> |
| No policy                                      | <b>0.552</b>  | <b>0.188</b> | <b>8.603</b>  | <b>1</b> | <b>0.003</b> | <b>1.737</b> | <b>1.201</b> | <b>2.512</b> | <b>-0.481</b>                   | <b>0.362</b> | <b>1.766</b> | <b>1</b> | <b>0.184</b> | <b>0.618</b> | <b>0.304</b> | <b>1.256</b> |
| Workplace attitude toward drinking at work     |               |              |               |          |              |              |              |              |                                 |              |              |          |              |              |              |              |
| Not acceptable (reference)                     |               |              | 6.775         | 2        | 0.034        |              |              |              |                                 |              | 0.106        | 2        | 0.948        |              |              |              |
| Discouraged                                    | <b>0.382</b>  | <b>0.204</b> | <b>3.499</b>  | <b>1</b> | <b>0.061</b> | <b>1.466</b> | <b>0.982</b> | <b>2.188</b> | <b>-0.126</b>                   | <b>0.392</b> | <b>0.103</b> | <b>1</b> | <b>0.748</b> | <b>0.882</b> | <b>0.409</b> | <b>1.902</b> |
| Tolerated or encouraged                        | <b>0.569</b>  | <b>0.266</b> | <b>4.571</b>  | <b>1</b> | <b>0.033</b> | <b>1.767</b> | <b>1.049</b> | <b>2.977</b> | <b>0.013</b>                    | <b>0.516</b> | <b>0.001</b> | <b>1</b> | <b>0.980</b> | <b>1.013</b> | <b>0.369</b> | <b>2.784</b> |
| Co-workers drink at work or come to work drunk | <b>0.834</b>  | <b>0.156</b> | <b>28.432</b> | <b>1</b> | <b>0.000</b> | <b>2.303</b> | <b>1.695</b> | <b>3.130</b> | <b>0.135</b>                    | <b>0.296</b> | <b>0.210</b> | <b>1</b> | <b>0.647</b> | <b>1.145</b> | <b>0.641</b> | <b>2.045</b> |
| High-risk drinking Age 25 (0,1,2) <sup>b</sup> | 2.227         | 0.187        | 141.497       | 1        | 0.000        | 9.268        | 6.422        | 13.376       |                                 |              |              |          |              |              |              |              |
| Adolescent alcohol use (1-8)                   | 0.207         | 0.049        | 17.676        | 1        | 0.000        | 1.230        | 1.117        | 1.355        |                                 |              |              |          |              |              |              |              |
| Male (0/1)                                     | 0.173         | 0.132        | 1.716         | 1        | 0.190        | 1.188        | 0.918        | 1.538        |                                 |              |              |          |              |              |              |              |
| White (0/1)                                    | -0.010        | 0.179        | 0.003         | 1        | 0.956        | 0.990        | 0.697        | 1.407        |                                 |              |              |          |              |              |              |              |
| 4-year college graduate (0/1)                  | 0.188         | 0.146        | 1.655         | 1        | 0.198        | 1.207        | 0.906        | 1.606        |                                 |              |              |          |              |              |              |              |
| Currently full-time student (0/1)              | 0.145         | 0.209        | 0.485         | 1        | 0.486        | 1.156        | 0.768        | 1.741        |                                 |              |              |          |              |              |              |              |
| Married (0/1)                                  | -0.520        | 0.199        | 6.865         | 1        | 0.009        | 0.594        | 0.403        | 0.877        |                                 |              |              |          |              |              |              |              |
| Has child or children (0/1)                    | -0.330        | 0.184        | 3.217         | 1        | 0.073        | 0.719        | 0.501        | 1.031        |                                 |              |              |          |              |              |              |              |
| Financial problems (0/1)                       | -0.116        | 0.151        | 0.591         | 1        | 0.442        | 0.890        | 0.663        | 1.197        |                                 |              |              |          |              |              |              |              |
| Months of full-time employment (1-12)          | 0.022         | 0.015        | 2.271         | 1        | 0.132        | 1.022        | 0.993        | 1.052        |                                 |              |              |          |              |              |              |              |
| High-risk industry (0/1)                       | 0.118         | 0.136        | 0.756         | 1        | 0.384        | 1.126        | 0.862        | 1.470        |                                 |              |              |          |              |              |              |              |
| Constant                                       | -1.809        | 0.279        | 41.972        | 1        | 0.000        | 0.164        |              |              |                                 |              |              |          |              |              |              |              |

Note: <sup>a</sup> Only one interaction between state and each of the workplace alcohol environment variables was included in the model at a time.

<sup>b</sup>1 = low risk, 2 = risky, 3 = hazardous or harmful
