# Supplementary material for: Alcohol-Tolerant Workplace Environments Are a Risk Factor for Young Adult Alcohol Misuse on and off the Job in Australia and the United States
Source: MDPI journal article supplement (doi:10.3390/ijerph20186725), 2023-09-07
Supplement: s1 [file s1]

**Supplemental Table S2. Unadjusted odds ratios (95% Confidence Interval) estimated using logistic regression showing the associations between dimensions of the workplace alcohol environment**

|                                                  | Alcohol is available at work | Workplace attitude toward alcohol use |                                            | Coworkers use alcohol at work |
|--------------------------------------------------|------------------------------|---------------------------------------|--------------------------------------------|-------------------------------|
|                                                  |                              | Discouraged vs. not acceptable        | Tolerated or encouraged vs. not acceptable |                               |
| Workplace does not have a written alcohol policy | 2.33<br>(1.72; 3.17)         | 3.94<br>(2.63; 5.90)                  | 5.46<br>(3.57; 8.34)                       | 2.10<br>(1.54; 2.87)          |
| Alcohol is available at work                     | -                            | 4.05<br>(2.97; 5.52)                  | 8.94<br>(6.11; 13.09)                      | 4.20<br>(3.32; 5.30)          |
| Workplace attitude toward alcohol use at work    |                              |                                       |                                            |                               |
| Tolerated/encouraged vs. not acceptable          | -                            | -                                     | -                                          | 3.25<br>(2.70; 3.91)          |
| Discouraged vs. not acceptable                   | -                            | -                                     | -                                          | 5.49<br>(4.00; 7.53)          |
