# Supplementary material for: Alcohol-Tolerant Workplace Environments Are a Risk Factor for Young Adult Alcohol Misuse on and off the Job in Australia and the United States
Source: Int J Environ Res Public Health. 2023 Sep 7;20(18):6725. doi: 10.3390/ijerph20186725 (PMC10530761; doi:10.3390/ijerph20186725)
Supplement: Supplementary file 1 [file ijerph-20-06725-s001.zip]

Archive with 4 entries (4 files):
- Oesterle_Supplemental Table S2.pdf
- Oesterle_Supplemental Tables S10 to S16.pdf
- Oesterle_Supplemental Tables S3 to S9.pdf
- Oestserle_Supplemental Table S1.pdf
